27 **Running Title:** Role of InsP Kinase ITPK1 in Auxin Signaling.

28

## 29 **ABSTRACT**

30 The combinatorial phosphorylation of *myo-inositol* results in the generation of different inositol  
31 phosphates (InsP), of which phytic acid (InsP<sub>6</sub>) is the most abundant species in eukaryotes. InsP<sub>6</sub>  
32 is also the precursor of higher phosphorylated forms called inositol pyrophosphates (PP-InsPs),  
33 such as InsP<sub>7</sub> and InsP<sub>8</sub>, which are characterized by a diphosphate moiety and are also  
34 ubiquitously found in eukaryotic cells. While PP-InsPs regulate various cellular processes in  
35 animals and yeast, their biosynthesis and functions in plants has remained largely elusive  
36 because plant genomes do not encode canonical InsP<sub>6</sub> kinases. Recently, it was shown that  
37 *Arabidopsis* ITPK1 catalyzes the phosphorylation of InsP<sub>6</sub> to the natural 5-InsP<sub>7</sub> isomer *in vitro*.  
38 Here, we demonstrate that *Arabidopsis* ITPK1 contributes to the synthesis of InsP<sub>7</sub> *in planta*. We  
39 further find a critical role of ITPK1 in auxin-related processes including primary root elongation,  
40 leaf venation, thermomorphogenic and gravitropic responses, and sensitivity towards  
41 exogenously applied auxin. Notably, 5-InsP<sub>7</sub> binds to recombinant auxin receptor complex,  
42 consisting of the F-Box protein TIR1, ASK1 and the transcriptional repressor IAA7, with high  
43 affinity. Furthermore, a specific increase in 5-InsP<sub>7</sub> in a heterologous yeast expression system  
44 results in elevated interaction of the TIR1 homologs AFB1 and AFB2 with various AUX/IAA-  
45 type transcriptional repressors. We also identified a physical interaction between ITPK1 and  
46 TIR1, suggesting a dedicated channeling of an activating factor, such as 5-InsP<sub>7</sub>, to the auxin  
47 receptor complex. Our findings expand the mechanistic understanding of auxin perception and  
48 lay the biochemical and genetic basis to uncover physiological processes regulated by 5-InsP<sub>7</sub>.

49

## 50 **INTRODUCTION**

51 The phytohormone auxin orchestrates a plethora of growth and developmental processes,  
52 including embryogenesis, root development and gravitropism (Teale et al., 2006; Lavenus et al.,  
53 2013; Salehin et al., 2015; Weijers and Wagner, 2016). Its distribution within plant tissues  
54 creates various organized patterns, such as leaf venation (Scarpella et al., 2006), phyllotactic  
55 patterns (Reinhardt et al., 2003; Jönsson et al., 2006; Hartmann et al., 2019) and xylem  
56 differentiation (Fukuda and Komamine, 1980; Bishopp et al., 2011; Smetana et al., 2019). Auxin  
57 perception is mediated by TRANSPORT INHIBITOR RESPONSE1 (TIR1) and AUXIN-  
58 SIGNALING F-BOX proteins (AFB1-5), which induce SCF ubiquitin-ligase-catalyzed

59 degradation of Aux/IAA transcriptional repressors to activate AUXIN RESPONSE FACTOR  
60 (ARF) transcription factors (Gray et al., 2001; Dharmasiri et al., 2005; Kepinski and Leyser,  
61 2005; Prigge et al., 2020). Unexpectedly, in a crystal structure of the auxin receptor complex  
62 consisting of insect-purified ASK1-TIR1 and an IAA7 degron peptide, insect-derived InsP<sub>6</sub>  
63 occupied the core of the leucine-rich-repeat (LRR) domain of TIR1 (Tan et al., 2007). While the  
64 functional importance of InsP<sub>6</sub> in auxin perception remains elusive, this molecule serves as a  
65 major phosphate store in seeds and as precursor of InsP<sub>7</sub> and InsP<sub>8</sub>, in which the *myo*-inositol  
66 ring contains one or more energy-rich diphosphate moieties.

67 PP-InsPs regulate a wide range of important biological functions, such as vesicular trafficking,  
68 ribosome biogenesis, immune response, DNA repair, telomere length maintenance, phosphate  
69 homeostasis, spermiogenesis, insulin signaling and cellular energy homeostasis in yeast and  
70 mammals (Wilson et al., 2013; Thota et al., 2015; Wild et al., 2016; Shears, 2017; Wilson et al.,  
71 2019). PP-InsPs were also identified in different plant species (Brearley and Hanke, 1996; Flores  
72 and Smart, 2000; Dorsch et al., 2003; Desai et al., 2014; Laha et al., 2015). They have been  
73 shown to represent potential targets of bacterial type III effector InsP hydrolytic enzymes in  
74 pepper and tomato (Blüher et al., 2017), to act as regulators of TOR signaling in  
75 *Chlamydomonas* (Couso et al., 2016), as well as to represent critical co-ligands of the  
76 CORONATINE INSENSITIVE 1/ JASMONATE ZIM DOMAIN (COI1-JAZ) jasmonate  
77 receptor complex (Laha et al., 2015; Laha et al., 2016). PP-InsPs were also shown to regulate  
78 phosphate sensing in *Arabidopsis* (Wild et al., 2016; Dong et al., 2019; Zhu et al., 2019) by  
79 promoting the physical interaction between PHOSPHATE STARVATION RESPONSE (PHR)  
80 transcription factors with stand-alone SYG1/Pho81/XPR1 (SPX) proteins (Wild et al., 2016;  
81 Dong et al., 2019). Upon interaction with PHRs, SPX proteins inhibit PHR-dependent activation  
82 of phosphate deficiency-induced genes, thereby preventing phosphate over-accumulation under  
83 conditions of high phosphate availability (Lv et al., 2014; Puga et al., 2014; Wang et al., 2014).  
84 Because of the low binding affinities of phosphate ions to the PHR1/SPX1 complex, a direct role  
85 of phosphate itself in regulating this interaction is rather unlikely (Lv et al., 2014; Puga et al.,  
86 2014; Wang et al., 2014). Notably, earlier studies indicated that inositol polyphosphates play a  
87 role in phosphate signaling, since defects in the INOSITOL PENTAKISPHOSPHATE 2-  
88 KINASE (IPK1), which catalyzes the conversion of InsP<sub>5</sub> [2-OH] to InsP<sub>6</sub>, results in defective  
89 phosphate starvation responses (PSR) in *Arabidopsis* (Stevenson-Paulik et al., 2005; Kuo et al.,

90 2014). In support of this, a more recent study showed that the inositol 1,3,4-trisphosphate 5-/6-  
91 kinase ITPK1 regulates phosphate homeostasis as well and that both *itpk1* and *ipk1* seedlings  
92 showed similar PSR phenotypes (Kuo et al., 2018). These phenotypes were proposed to be  
93 associated with increased levels of an InsP<sub>4</sub> isomer of yet unknown isomer identity (Kuo et al.,  
94 2018). Work by Wild and colleagues (2016) pointed to a role of PP-InsPs in phosphate  
95 regulation, by showing that 5-InsP<sub>7</sub> induces a physical interaction between the rice proteins  
96 OsPHR2 and OsSPX4 at micromolar concentrations. More recently, Arabidopsis mutants  
97 defective in the PPIP5K/ Vip1-type InsP<sub>7</sub> kinases VIH1 and VIH2, and hence defective in InsP<sub>8</sub>  
98 synthesis, were shown to display disturbed PSR and strong phosphate over-accumulation,  
99 supporting the idea that PP-InsPs regulate phosphate homeostasis (Dong et al., 2019; Zhu et al.,  
100 2019).

101 Metabolic pathways leading to the production of PP-InsPs are well established in yeast and  
102 metazoan. There, IP6K/ Kcs1-type kinases phosphorylate InsP<sub>6</sub> at the 5 position, generating 5-  
103 InsP<sub>7</sub> (Saiardi et al., 1999; Draskovic et al., 2008), while PPIP5K/ Vip1 proteins catalyze the  
104 phosphorylation of 5-InsP<sub>7</sub> to generate 1,5-InsP<sub>8</sub> (Mulugu et al., 2007; Lin et al., 2009; Zhu et  
105 al., 2019). Vip1 enzymes are ubiquitously found in plants from green algae to monocot and  
106 eudicot angiosperms (Laha et al., 2015). However, the identity of enzymes responsible for InsP<sub>7</sub>  
107 synthesis and roles for InsP<sub>7</sub> in plants still remain elusive.

108 Recently, we demonstrated that recombinant Arabidopsis ITPK1 and ITPK2 phosphorylate InsP<sub>6</sub>  
109 to 5-InsP<sub>7</sub> *in vitro*, the major InsP<sub>7</sub> isomer identified in Arabidopsis seeds (Laha et al., 2019). In  
110 this study, we characterized ITPK1-deficient plants in more detail and find that ITPK1-  
111 deficiency compromised inositol polyphosphate homeostasis, including reduced levels of InsP<sub>7</sub>  
112 and InsP<sub>8</sub>. Our study reveals that *itpk1* plants display auxin perception phenotypes that are  
113 independent of disturbed PSR and demonstrate that a specific increase in 5-InsP<sub>7</sub> potentiates the  
114 interaction of various TIR1 homologs with Aux/IAA-type transcriptional repressors in yeast. We  
115 also provide evidence for a direct interaction of ITPK1 with the auxin co-receptor component  
116 TIR1 *in planta*, suggesting a dedicated substrate channeling of ITPK1-dependent InsPs/PP-InsPs  
117 to activate auxin signaling.

118

119

## 120 **RESULTS**

### 121 **ITPK1-deficient Plants Show Altered Inositol Polyphosphate Profile**

122 The discovery that ITPK1 and ITPK2 exhibit InsP<sub>6</sub>-kinase activity *in vitro* (Laha et al., 2019)  
123 encouraged us to investigate the physiological function of these kinases. QPCR analyses  
124 revealed ubiquitous expression of *ITPK1* and *ITPK2* (Fig. 1A). While high levels of *ITPK1*  
125 transcripts were detected in all plant tissues, the expression of *ITPK2* was notably strong in the  
126 root and hypocotyl. To assess the contribution of ITPK1 and ITPK2 in InsP<sub>7</sub> synthesis, we  
127 analyzed loss-of-function T-DNA insertion lines for both genes (Supplemental Fig. S1A). SAX-  
128 HPLC analyses of [<sup>3</sup>H]-inositol-labeled seedlings revealed no differences in InsP<sub>7</sub> content  
129 between wild-type and the *itpk2-2* mutant (Supplemental Fig. S1B). Likewise, no differences in  
130 the amount of InsP<sub>6</sub>, the most abundant inositol phosphate, were found between Col-0 wild-type  
131 and *itpk1* seedlings (Fig. 1B-E and Supplemental Fig. S1C). However, *itpk1* seedlings displayed  
132 reduced levels of InsP<sub>7</sub> and InsP<sub>8</sub> (Fig. 1C, E), suggesting that ITPK1 functions as a cellular  
133 InsP<sub>6</sub> kinase. Unchanged ratios of InsP<sub>8</sub>/InsP<sub>7</sub> (Supplemental Fig. S1D) indicate that ITPK1 does  
134 not have InsP<sub>7</sub> kinase function. In agreement/line with previously published *in vitro* data  
135 demonstrating that ITPK homologs can phosphorylate different InsP<sub>3</sub> and InsP<sub>4</sub> isomers  
136 (Sweetman et al., 2007; Stiles et al., 2008), we also observed compromised InsP<sub>5</sub> [1/3-OH] levels  
137 and a strong increase in as yet unknown isomers of InsP<sub>3</sub> and InsP<sub>4</sub> in *itpk1* plants (Fig. 1B-C, E  
138 and Supplemental Fig. S1C). These observations are largely in agreement with recent findings of  
139 Kuo and colleagues (Kuo et al., 2018), who analyzed [<sup>32</sup>P]-labeled seedlings, except for a  
140 reduction in InsP<sub>6</sub> in *itpk1* seedlings reported by these authors, which we did not detect with  
141 [<sup>3</sup>H]-inositol-labeling. To address this point in more detail, we analyzed unlabeled plants by TiO<sub>2</sub>  
142 pulldown-based protocol with subsequent separation on PAGE and toluidine staining (Wilson et

143 al., 2015). In agreement with our SAX-HPLC analyses of [<sup>3</sup>H]-inositol-labeled seedlings, we did  
144 not observe any differences in cellular InsP<sub>6</sub> in *itpk1* seedlings (Fig. 1D, E).

145

## 146 **ITPK1 Plays a Critical Role in Auxin-Related Processes**

147 Next, we assessed the physiological consequences of the detected changes in inositol  
148 polyphosphates in *itpk1* plants. Compared to Col-0 wild-type, primary root elongation was  
149 impaired in *itpk1* plants (Supplemental Fig. S2A), a phenotype that could be fully rescued by  
150 introducing the genomic *ITPK1* fragment C-terminally fused to G3GFP (Supplemental Fig. S2A,  
151 S2B and S2C). This ITPK1-G3GFP fusion also rescued yeast *kcs1Δ*-associated growth defects  
152 (Supplemental Fig. S2D). We further noticed an *itpk1*-associated defect in leaf venation. The T-  
153 DNA insertional mutant displayed an increased number of end points, as well as compromised  
154 gravitropic root curvature (Fig. 2A and 2B; Supplemental Fig. S3A). Both defects were also  
155 robustly complemented in *itpk1* lines expressing the genomic *ITPK1* fragment.

156 The phenotypic defects exhibited by *itpk1* plants are reminiscent of impaired auxin signaling  
157 (Sieburth, 1999; Scarpella et al., 2006; Teale et al., 2006; Salehin et al., 2015; Weijers and  
158 Wagner, 2016). To further test this possibility, we performed auxin sensitivity assays (Lincoln et  
159 al., 1990; Ruegger et al., 1998) by determining the root length after exogenous application of the  
160 natural auxin indole-3-acetic acid (IAA). While wild-type seedlings displayed gradually shorter  
161 roots in the presence of increasing amounts of IAA, *itpk1* seedlings were more resistant to the  
162 exogenous supply of auxin (Fig. 2C; Supplemental Fig. S3B and S3C). Auxin-insensitivity of  
163 *itpk1* plants was fully rescued in independent complemented lines expressing the genomic *ITPK1*  
164 fragment (Fig. 2C; Supplemental Fig. S3C). We then examined thermomorphogenesis, an  
165 adaptation response to elevated temperatures controlled by auxin (Ruegger et al., 1998; Quint et  
166 al., 2016; Wang et al., 2016; Bellstaedt et al., 2019). As reported earlier, exposure of wild-type  
167 seedlings to 29°C resulted in increased primary root length (Wang et al., 2016). However, this  
168 high temperature-induced response was severely compromised in *itpk1* plants (Fig. 2D),  
169 resembling auxin receptor mutants (Wang et al., 2016). The reduced root development of *itpk1*  
170 plants under high temperature was rescued in independent complemented lines (Fig. 2D). With

171 these observations, we concluded that *ITPK1* has an important function in auxin-related growth  
172 and developmental processes.

173

### 174 **Impaired Auxin Responses in *itpk1* Plants is Not Caused by Altered Auxin Synthesis or** 175 **Transport**

176 Auxin levels in shoots and roots, as well as polar auxin transport were similar between *itpk1* and  
177 Col-0 wild-type plants (Fig. 2E and 2F), suggesting that the observed phenotypic differences  
178 were not related to either the synthesis or the transport of auxin. We also tested sensitivity to the  
179 synthetic auxin analog 1-naphthaleneacetic acid (NAA), which can bypass auxin carrier-  
180 mediated transport mechanisms as it diffuses more easily through membranes than IAA  
181 (Delbarre et al., 1996). The *itpk1* line was also less sensitive to NAA when compared to wild-  
182 type plants (Supplemental Fig. S3D), confirming that altered auxin transport is unlikely to cause  
183 the observed phenotypes. In contrast, the expression of several marker genes associated with  
184 auxin signaling were compromised in *itpk1* plants and rescued in complemented lines  
185 (Supplemental Fig. S3E). Taken together, these results suggest that *itpk1* plants are defective in  
186 auxin responses.

187

### 188 **Defects in Phosphate Homeostasis and in Auxin Responses Are Largely Independent** 189 **Consequences of *itpk1* Loss of Function**

190 Recently, it was reported that *itpk1* plants exhibit constitutive PSRs, which result in phosphate  
191 over-accumulation in leaves when plants are grown with sufficient phosphate supply (Kuo et al.,  
192 2018). To assess whether increased phosphate accumulation can affect auxin sensitivity, we  
193 analyzed the *pho2* mutant, in which disrupted phosphate signaling downstream of PHR1 leads to  
194 phosphate over-accumulation (Aung et al., 2006; Bari et al., 2006). Notably, we did not find  
195 significant differences between Col-0 wild-type and *pho2-1* plants with respect to gravitropic  
196 responses, sensitivity of primary root growth to auxin or high temperature-induced primary root  
197 elongation (Supplemental Fig. S4). We also found that phosphorus over-accumulation in *itpk1*  
198 plants was largely unaffected by auxin (Supplemental Fig. S5A), suggesting that exogenously  
199 applied auxin does not alter phosphate accumulation in shoots. However, when plants were



200 grown on low phosphate, a condition that strongly inhibits primary root elongation (Gutierrez-  
201 Alanis et al., 2018), the auxin insensitive primary root growth of *itpk1* plants was not observed  
202 anymore (Supplemental Fig. S5B and S5C). Overall, these findings indicate that the impaired  
203 PSR of *itpk1* plants under sufficient phosphate supply does not explain the auxin-related  
204 phenotypes and that both the uncontrolled phosphate accumulation and defective auxin  
205 responsiveness are independent responses.

206

### 207 **Defects in Auxin Responses Correlate with Altered Inositol Polyphosphate and Inositol** 208 **Pyrophosphate Homeostasis**

209 To dissect which inositol derivatives are possibly involved in auxin signaling, we employed  
210 different mutants affected in inositol polyphosphate synthesis. In line with the largely unchanged  
211 InsP profile, *itpk2-2* plants did not display defects in gravitropic responses nor did they show  
212 increased auxin sensitivity of primary root growth (Supplemental Fig. S6A and S6B). Similar to  
213 *itpk1*, auxin responses were also significantly decreased in *ipk1-1* mutant plants (Supplemental  
214 Fig. S6C and S6D), which have compromised conversion of InsP<sub>5</sub> [2-OH] to InsP<sub>6</sub> (Stevenson-  
215 Paulik et al., 2005; Kuo et al., 2014) and hence have reduced InsP<sub>6</sub>, InsP<sub>7</sub> and InsP<sub>8</sub> levels (Laha  
216 et al., 2015). Thus, common denominators between *ipk1-1* and *itpk1* mutant plants are decreases  
217 in InsP<sub>5</sub> [1/3-OH], InsP<sub>7</sub> and InsP<sub>8</sub> and an increase in InsP<sub>4a</sub> (Fig. 1B-E; Supplemental Fig. S1C  
218 and (Stevenson-Paulik et al., 2005; Laha et al., 2015), suggesting that one or several of these  
219 inositol polyphosphate isomers are critical for auxin signaling.

220 Next, we analyzed inositol polyphosphates in *itpk4-1* mutant plants. In agreement with recent  
221 findings of Kuo and colleagues (Kuo et al., 2018), we detected a robust reduction of InsP<sub>6</sub> in  
222 *itpk4-1* as compared to wild-type Col-0 (Fig. 3A, 3B and 3C). We also observed reduced InsP<sub>5</sub>  
223 [1/3-OH] levels in this mutant (Fig. 3B and 3C). However, in contrast to the findings by Kuo and  
224 colleagues (2018), our SAX-HPLC analysis of [<sup>3</sup>H]-inositol-labeled seedlings did not detect any  
225 changes in InsP<sub>7</sub> and InsP<sub>8</sub> levels in *itpk4-1* as compared to wild-type plants (Fig. 3B and 3C).  
226 Notably, root growth of the *itpk4-1* line was not compromised in auxin sensitivity (Fig. 3D). In  
227 conclusion, a global reduction in InsP<sub>5</sub> [1/3-OH] or InsP<sub>6</sub> does not appear to result in auxin-  
228 related phenotypes and *itpk1*-dependent defects in auxin perception seem to occur without  
229 decreasing InsP<sub>3b</sub>. In summary, these findings suggest that either the reduction in InsP<sub>7</sub> or InsP<sub>8</sub>

230 or an increase in InsP<sub>4a</sub>, or a combinatorial derangement of these three inositol polyphosphates  
231 resulted in defective auxin responses in the *itpk1* and *ipk1-1* lines.

232 To address the question of whether InsP<sub>8</sub> is involved in auxin perception, we investigated two  
233 independent *vih2* lines (*vih2-3* and *vih2-4*), in which virtually no InsP<sub>8</sub> can be detected in  
234 vegetative tissues (Laha et al., 2015). Notably, both mutants were undistinguishable from Col-0  
235 wild-type plants with respect to thermomorphogenesis, gravitropism and sensitivity of the  
236 primary root to auxin (Supplemental Fig. S7A, S7B and S7C). Thus, these results suggest that  
237 bulk InsP<sub>8</sub> has no critical role in auxin signaling.

238

### 239 ***In Vitro* Reconstitution Assays Suggest that Higher Inositol Polyphosphates Bind to the** 240 **Auxin-receptor Complex with High Affinities**

241 Considering the unknown isomer identity of the InsP<sub>4</sub> species accumulating in *itpk1* lines (15  
242 distinct InsP<sub>4</sub> isomers are possible but only a few are commercially available, which allows  
243 limited evaluation of these isomers), we purified the InsP<sub>4a</sub> species from the *itpk1* SAX-HPLC  
244 run. When incubated with recombinant ITPK1 and ATP, purified InsP<sub>4a</sub> was efficiently  
245 phosphorylated (Supplemental Fig. S8A), suggesting that InsP<sub>4a</sub> is an *in vivo* substrate of ITPK1.  
246 Furthermore, we performed direct auxin receptor complex binding assays with purified [<sup>3</sup>H]-  
247 InsP<sub>3b</sub> and [<sup>3</sup>H]-InsP<sub>4a</sub> that accumulate in ITPK1-deficient plants and found that binding of the  
248 [<sup>3</sup>H]-InsP<sub>4</sub> species is detectable, although significantly reduced as compared to InsP<sub>6</sub>  
249 (Supplemental Fig. S8B). No detectable binding of the [<sup>3</sup>H]-InsP<sub>3</sub> species accumulating in *itpk1*  
250 seedlings was observed (Supplemental Fig. S8B). These data suggest that InsP<sub>4a</sub> cannot be  
251 excluded as a potential direct (negative) regulator of auxin perception while InsP<sub>3b</sub> is unlikely to  
252 play a direct role in auxin receptor regulation.

253 To further investigate the contribution of ITPK1 in auxin perception, we performed competitive  
254 binding assays with insect cell-purified ASK1-TIR1, recombinant Aux/IAA protein, natural  
255 auxin (IAA), and [<sup>3</sup>H]-InsP<sub>6</sub> to determine IC<sub>50</sub> values (50% displacement of radioligand binding)  
256 for ITPK1-dependent inositol polyphosphates and related molecules. IC<sub>50</sub> values of different InsP  
257 species to compete with [<sup>3</sup>H]-InsP<sub>6</sub> were as follows: InsP<sub>6</sub> (IC<sub>50</sub>: 19 nM) ≤ 5-InsP<sub>7</sub> (IC<sub>50</sub>: 20 nM)  
258 < InsP<sub>5</sub> [3-OH] (IC<sub>50</sub>: 31 nM) < InsP<sub>5</sub> [5-OH] (IC<sub>50</sub>: 34 nM) < InsP<sub>5</sub> [1-OH] (IC<sub>50</sub>: 114 nM) (Fig.  
259 4). These results indicated that the ASK1-TIR1-IAA complex has distinct binding affinities

260 towards different inositol phosphate isomers (including enantiomers) with InsP<sub>6</sub> and InsP<sub>7</sub>  
261 displaying the highest affinities.

262

### 263 **The Inositol Pyrophosphate 5-InsP<sub>7</sub> Potentiates the Interaction Between F-Box Proteins** 264 **and Aux/IAA Repressors in Yeast**

265 To delineate a potential role of 5-InsP<sub>7</sub> in auxin-receptor complex formation *in vivo*, we  
266 performed yeast two-hybrid (Y2H) assays using the yeast EGY48 strain (Calderon Villalobos et  
267 al., 2012) and an isogenic strain lacking the *VIP1* gene. Mutation of *VIP1* in this yeast strain  
268 results in a specific accumulation of the 5-InsP<sub>7</sub> isomer without changing levels of InsP<sub>6</sub>, InsP<sub>4</sub>  
269 species, or any other inositol polyphosphate (Fig. 5A; Supplemental Fig. S9A), as also shown in  
270 other yeast genetic backgrounds (Onnebo and Saiardi, 2009; Laha et al., 2015). The interaction  
271 of the F-box protein AFB1 with the Aux/IAA proteins IAA5, IAA7, and IAA8 was robustly  
272 elevated in the *vip1*Δ strain (Fig. 5B). Similar results were also obtained when AFB2 was used as  
273 bait in the assay (Fig. 5C; Supplemental Fig. S9B), suggesting that 5-InsP<sub>7</sub> potentiates auxin  
274 receptor complex formation in this system.

275

### 276 **ITPK1 Interacts with TIR1**

277 A previously identified interaction of mammalian InsP<sub>6</sub>-kinase IP6K2 with a protein complex  
278 activated by casein kinase 2, an enzyme that requires InsP<sub>7</sub> for full activity (Rao et al., 2014),  
279 suggested that PP-InsPs might be generated in close proximity to dedicated effector proteins.  
280 Since 5-InsP<sub>7</sub>, an ITPK1-dependent inositol pyrophosphate, binds with strong affinity to the  
281 TIR1-ASK1 receptor complex (Fig. 4), we investigated whether ITPK1 physically interacts with  
282 TIR1 to facilitate targeted delivery of 5-InsP<sub>7</sub>. To test this hypothesis, we first performed co-  
283 immunoprecipitation assays. We took advantage of Arabidopsis *itpk1* complemented with  
284 *gITPK1-G3GFP* complemented lines, for which expression of GFP-fused ITPK1 and  
285 endogenous TIR1 could be detected using GFP and TIR1 antibodies, respectively (Fig. 6A).  
286 Immunoprecipitation of ITPK1-G3GFP using GFP antibody allowed the subsequent detection of  
287 TIR1 as a co-immunoprecipitant, suggesting that ITPK1 associates with TIR1 *in vivo*.

288 To further validate the interaction between ITPK1 and TIR1, we used bimolecular fluorescence  
289 complementation (BiFC) assays. Both co-expressions of nVenus-ITPK1 with cCFP-TIR1 and of  
290 nVenus-TIR1 with cCFP-ITPK1 in *Nicotiana benthamiana* resulted in YFP fluorescence in the  
291 nucleus (Fig. 6B). In contrast, no fluorescence was detected in any BiFC combination of ITPK1  
292 with GUS or of TIR1 with GUS, respectively (Fig. 6B). Taken together, these results  
293 demonstrate that ITPK1 physically interacts with TIR1.

294

## 295 **DISCUSSION**

296

### 297 **Potential Mechanism of ITPK1-Dependent Auxin Perception**

298 Recently, it has been shown that phosphate homeostasis is impaired in *ipk1-1* and *itpk1* plants  
299 (Kuo et al., 2014; Kuo et al., 2018). In the present study, we show that both mutants also exhibit  
300 various growth and developmental phenotypes associated with defective auxin perception. We  
301 also provide evidence that the auxin- and phosphate-related phenotypes of *itpk1* plants are  
302 largely independent, since: i) phosphate over-accumulation *per se* did not result in defective  
303 auxin response (Supplemental Fig. S4); and ii) additional auxin supply could not prevent  
304 uncontrolled phosphate accumulation in *itpk1* shoots (Supplemental Fig. S5). These results also  
305 reflect the distinct roles of different inositol polyphosphates, which are produced in an ITPK1-  
306 dependent manner (Fig. 1B-E).

307 The impaired auxin responses of *ipk1-1* and *itpk1* plants are most likely not caused by  
308 compromised stability of the auxin co-receptor F-box protein TIR1, as suggested by immunoblot  
309 analyses (Supplemental Fig. S10A). Instead, we propose that ITPK1-dependent InsPs/PP-InsPs  
310 induce the auxin receptor complex, therefore resulting in more efficient auxin signaling. The  
311 previously published crystal structure of the auxin receptor complex with insect-purified InsP<sub>6</sub>  
312 (Tan et al., 2007) revealed a large hydrophilic binding pocket in which InsP<sub>6</sub> is coordinated by  
313 extensive interactions with basic residues of the concave surface of the TIR1 leucine rich repeat  
314 (LRR) solenoid (Supplemental Fig. S10B) (Tan et al., 2007). Reminiscent for what has been  
315 predicted for the InsP<sub>8</sub>-bound F-box component COI1 of the jasmonate receptor complex (Laha  
316 et al., 2016), these interactions are highly anisotropic. As illustrated in Supplemental Fig. S10B,

317 basic residues distal and proximal to the hormone binding pocket likely contribute to the  
318 elliptical shape of the LRR solenoid. Notably, the 5-position of InsP<sub>6</sub> is protruding towards the  
319 IAA7 degron residue R90. The distance between the 5-phosphate and closest amino group of the  
320 R90 side chain of 5.6 Å suggests that the pyrophosphate moiety of 5-InsP<sub>7</sub>, if oriented similarly  
321 as InsP<sub>6</sub>, would stabilize the IAA7 degron interaction with an additional strong polar interaction.  
322 Considering the architecture of the SCF<sup>TIR1</sup> auxin receptor complex (Dinesh et al., 2016), even  
323 small changes in the orientation of the IAA degron relative to TIR1 are likely to have strong  
324 consequences with respect to the ubiquitination efficiency and thus degradation of the Aux/IAA  
325 repressor and subsequent activation of auxin-responsive gene expression. In absence of a 5-  
326 InsP<sub>7</sub>-bound crystal structure of the auxin receptor complex, *in silico* docking experiments  
327 combined with molecular dynamics simulations and in parallel *cryo* EM studies could provide  
328 more mechanistic details on the role of 5-InsP<sub>7</sub> on auxin receptor function.

329 Our results point to a possible direct role of ITPK1-dependent inositol polyphosphates in auxin  
330 perception. This idea was corroborated by yeast two-hybrid assays that suggest 5-InsP<sub>7</sub> might  
331 represent a critical co-ligand of the ASK1-TIR1-Aux/IAA auxin co-receptor complex controlling  
332 auxin perception. However, we cannot exclude the possibility that other species altered in *itpk1*  
333 plants (or combinations thereof), such as InsP<sub>5</sub> [1/3-OH] or isomers of InsP<sub>3</sub>, InsP<sub>4</sub> and InsP<sub>8</sub>  
334 may also contribute to the auxin-perception defect in these plants. The concept that efficient  
335 auxin perception by the auxin receptor complex might require two ligands, i.e., auxin and 5-InsP<sub>7</sub>  
336 or another ITPK1-dependent inositol polyphosphate, appears reminiscent of jasmonate  
337 perception reported to rely on the coincidence detection of a JA-conjugate and the inositol  
338 pyrophosphate InsP<sub>8</sub> (Laha et al., 2015). Such coincidence detection might be used to fine-tune  
339 hormone response depending on other internal or external cues.

340

### 341 **Substrate Channeling by ITPK1**

342 Our work reveals a physical interaction of ITPK1 with TIR1 (Fig. 6). While further work will be  
343 necessary to establish whether this interaction is of functional relevance and how it is regulated,  
344 we hypothesize that the apparent close proximity of ITPK1 to the auxin receptor complex might  
345 create a privileged, local enrichment of InsPs/PP-InsPs to a dedicated effector protein complex  
346 similar to what has been observed for casein kinase 2 in mammalian cells (Rao et al., 2014).

347 While we cannot exclude the possibility that the interaction of ITPK1 and TIR1 might help to  
348 generate an important signaling molecule at minimal energetic cost, we speculate that this  
349 interaction more likely represents a mechanism to prevent or to control the stimulation of other  
350 signaling events triggered by the same molecule. This would be particularly intriguing for PP-  
351 InsPs, whose long distance cellular movement is likely restricted, assuming their lifetime is as  
352 similarly short as mammalian PP-InsPs (Menniti et al., 1993) .

353 To better understand the role of 5-InsP<sub>7</sub> and other ITPK1-dependent InsPs and/or PP-InsPs in  
354 auxin perception, it will be important to examine whether also AFBs interact with ITPK1 or  
355 other inositol polyphosphate kinases. It will also be important to know whether such dedicated  
356 interactions, and hence localized generation of regulatory molecules, might contribute to the  
357 specificity by which auxin controls many different aspects of plant growth and development. To  
358 explore if and how InsPs and PP-InsPs can contribute to the crosstalk between jasmonate and  
359 auxin signaling, and nutritional cues, tools have to be developed to follow InsPs and PP-InsPs  
360 with high specificity and with high temporal and spatial resolution. The work presented here  
361 provides a first step to unveil the physiological processes regulated by 5-InsP<sub>7</sub> and other ITPK1-  
362 dependent InsPs and PP-InsPs and opens new avenues to manipulate and better understand  
363 inositol pyrophosphate signaling in eukaryotic cells.

364

## 365 **METHODS**

### 366 **Plant Material and Growth Conditions**

367 Seeds of T-DNA insertion lines of *Arabidopsis thaliana* (ecotype Col-0) were obtained from The  
368 European Arabidopsis Stock Centre (<http://arabidopsis.info/>). The *itpk1* (SAIL\_65\_D03), *itpk 2-*  
369 *2* (SAIL\_1182\_E03) and *itpk4-1* (SAIL\_33\_G08) were genotyped for homozygosity using T-  
370 DNA left and right border primers and gene-specific sense or antisense primers (Table S1). The  
371 *pITPK1:gITPK1-G3GFP* construct was generated as described in the cloning section. Auxin  
372 assays were performed with *vih2-3*, *vih2-4*, and *ipk1-1* (Laha et al., 2015), as well as *pho2-1*  
373 (Delhaize and Randall, 1995) mutant plants. Wild-type Col-0 and all relevant transgenic lines  
374 were amplified together on a peat-based substrate (GS90) under identical conditions (16 h light  
375 and 8 h dark, day/night temperatures 22/18°C and 120 μmol<sup>-1</sup> m<sup>-2</sup> light intensity), and seeds of  
376 the respective last progenies were harvested and used for all analyses described in this article.



377 For sterile growth, seeds were surface sterilized in 70% (v/v) ethanol and 0.05% (v/v) Triton X-  
378 100 for 30 min and washed twice with 90% (v/v) ethanol. Sterilized seeds were sown on solid  
379 plant media supplemented with 0.5x MS (Murashige and Skoog), 1% sucrose, 0.8% phytigel,  
380 stratified for 2 days at 4°C, and grown under conditions of 8 h light (23°C) and 16 h dark (21°C),  
381 unless mentioned otherwise.

382

### 383 **Constructs and Strains**

384 The *IAA7* ORF was amplified from cDNA of 2-week-old wild-type Col-0 seedlings. The forward  
385 and reverse primes used to amplify the ORFs contained restriction sites as indicated in Table S1.  
386 Amplified PCR products were inserted into CloneJET™ (Thermo Scientific) following the  
387 manufacturer's instructions. The ORFs were then excised from respective CloneJET™ vectors  
388 and subcloned into the pET28-His<sub>8</sub>-MBP vector (Laha et al., 2015).

389 For complementation of *itpk1* plants, a genomic fragment encoding ITPK1 including a 1839-bp  
390 region upstream of the *ITPK1* start codon was amplified from wild-type Col-0 genomic DNA,  
391 cloned into pENTR-D-TOPO and recombined with pGWB550 (Nakagawa et al., 2007) to  
392 generate a plant transformation vector containing the genomic *ITPK1* in translational fusion with  
393 a C-terminal G3GFP. Transformed lines were selected on solid plant media with 25 µg/mL  
394 hygromycin.

395 For yeast two-hybrid assays, the EGY48 *vip1Δ* strain was generated following a strategy as  
396 previously described (Hegemann and Heick, 2011). Briefly, a marker gene cassette flanked by  
397 *loxP* sites was amplified from pUG6 (Euroscarf) with primers harboring 40 nucleotide-5'-  
398 overhangs for homologous recombination, as listed in Table S1. The DDY1810 strain was  
399 transformed with the PCR products. Knockout strains were genotyped with gene promoter-  
400 specific forward and cassette-specific reverse primers. Yeast transformation was performed by  
401 the Li-acetate method (Gietz et al., 1992).

402

### 403 **Extraction and SAX-HPLC Analyses of Yeast and *A. thaliana***

404 Extraction and quantification of inositol polyphosphates from yeast and from Arabidopsis  
405 seedlings were carried out as described (Laha et al., 2015). For the latter, 10-day-old Arabidopsis  
406 seedlings grown in 8 h light/16 h dark condition in media supplemented with 0.5x MS, 1%

407 sucrose, 0.8% phytigel were transferred to 3 mL liquid sterile media containing 0.5x MS, pH  
408 5.7, 30  $\mu\text{Ci mL}^{-1}$  of [ $^3\text{H}$ ]-*myo*-inositol (30 to 80 Ci  $\text{mmol}^{-1}$ ; Biotrend; ART-0261-5). Seedlings  
409 were allowed to label for 6 days, then washed twice in  $\text{dH}_2\text{O}$  and frozen in liquid  $\text{N}_2$ . Extraction  
410 of inositol polyphosphates was done as described (Azevedo and Saiardi, 2006) and extracts were  
411 resolved by strong anion exchange high performance liquid chromatography (SAX-HPLC) using  
412 a Partisphere SAX 4.6 x 125 mm column (Whatman) at a flow rate of  $0.5 \text{ mL min}^{-1}$  with a  
413 shallow gradient formed by buffers A (1 mM EDTA) and B [1 mM EDTA and 1.3 M  
414  $(\text{NH}_4)_2\text{HPO}_4$ , pH 3.8, with  $\text{H}_3\text{PO}_4$ ] (Laha et al., 2015).

415

### 416 **Root Gravitropism Assays**

417 Seedlings were grown on vertical plates containing sterile 0.5x MS media in 8 h light/16 h dark  
418 condition. After 7 days, seedlings were transferred to solid plant media supplemented with 0.5x  
419 MS, 1% sucrose and 0.8% phytigel. Unless mentioned otherwise, after another 7 days of growth,  
420 the seedlings of indicated genotypes were rotated by  $90^\circ$  and the gravitropic curvature was  
421 measured at different time points and scored in categories of  $20^\circ$ .

422

### 423 **Leaf Venation Analyses**

424 Fixation and dehydration of plant tissue was done as described (Sieburth, 1999). Briefly, the  
425 plant tissue was immersed overnight in a 3:1 mixture of ethanol: acetic acid and then dehydrated  
426 through 80%, 90%, 95% and 100% (v/v) ethanol. For clearing, the tissue was incubated in  
427 saturated chloral hydrate solution (2.5 g/ mL) overnight. The tissue was visualized and imaged  
428 by a Zeiss Axio zoomV16 microscope system. Leaf venation analyses were performed using  
429 LIMANI (Dhondt et al., 2012).

430

### 431 **Auxin Transport**

432 Polar auxin transport assays were performed as previously described (Ruegger et al., 1998). In  
433 short, 4 cm long inflorescence stems of 6-week-old plants were excised and the apical end was  
434 placed into a 1.5 mL microfuge tube containing 50  $\mu\text{L}$  of labelling solution supplemented with  
435 0.5x MS, 1% sucrose, pH 5.7 and  $0.06 \text{ nCi mL}^{-1}$  of [ $^3\text{H}$ ]- indole-3-acetic acid (15 to 30 Ci  $\text{mmol}^{-1}$ ;  
436 Biotrend; ART 0340). The excised stems were incubated in the solution for different time  
437 points. A 0.8-cm-section from the basal end of the labelled stem was excised and placed in a vial



438 containing 2 mL of scintillation cocktail and incubated overnight before radioactivity was  
439 measured by scintillation counting.

440

#### 441 **Hormone Measurements**

442 Roots and shoots of 2-week-old seedlings grown in 8 h light/16 h dark condition were excised  
443 and collected separately. Auxin measurements were done as previously described (Eggert and  
444 von Wiren, 2017).

445

#### 446 **Gene Expression Analyses**

447 RNA extraction, cDNA synthesis and qPCR analyses were performed as previously described  
448 (Laha et al., 2015). Seedlings were grown vertically on sterile media supplemented with 0.5x  
449 MS, 1% sucrose, 0.8% phytigel for 11 days in 8 h light/16 h dark condition, then transferred to  
450 liquid media supplemented with 0.5x MS, 1% sucrose, pH 5.7 and allowed to grow for another 2  
451 days before harvesting. Total RNA extraction was performed using the RNeasy Plant Mini Kit  
452 (Qiagen). For cDNA synthesis, 1 µg of RNA was treated with DNase I. The reverse transcription  
453 was performed according to the manufacturer's instructions (Roboklon; AMV Reverse  
454 Transcriptase Native). SYBR Green reaction mix (Bioline; Sensimix SYBR No-ROX kit) was  
455 used in a Bio-Rad CFX384 real-time system for qPCR. The results were evaluated using the Bio-  
456 Rad CFX Manager 2.0 (admin) system. *PP2AA3* was used as a reference gene.

457

#### 458 ***In Vitro* Kinase Assay**

459 Recombinant enzymes were purified as described for the yeast Sfh1 protein (Schaaf et al., 2006).  
460 InsP<sub>6</sub> kinase assays were performed by incubating enzymes in 15 µL reaction volume containing  
461 20 mM HEPES (pH 7.5), 5 mM MgCl<sub>2</sub>, 5 mM phosphocreatine, 0.33 units creatine kinase, 12.5  
462 mM ATP, 1 mM InsP<sub>6</sub> and 1 mM DTT. The reaction was incubated at 28°C for 4 h, separated by  
463 PAGE and stained by toluidine blue (Losito et al., 2009). The InsP<sub>4a</sub> kinase assay with  
464 recombinant ITPK1 was performed using the same reaction conditions described above. Here,  
465 InsP<sub>4a</sub> was purified from [<sup>3</sup>H]-inositol labelled *itpk1* plants as described earlier (Blüher et al.,  
466 2017).

467

#### 468 ***In Vitro* Radioligand-Binding-Based Reconstitution Assays**

469 The *in vitro* binding assays were performed as previously described (Laha et al., 2016). InsP<sub>5</sub>  
470 isomers were obtained from Slichem (Bremen, Germany) and [<sup>3</sup>H]-InsP<sub>6</sub> was purchased from  
471 Biotrend (ART-1915-10). His<sub>8</sub>-MBP-IAA7 was isolated using a protocol used for protein  
472 purification of the yeast Sfh1 (Schaaf et al., 2006). ASK1-TIR1 was purified from insect cells as  
473 described (Tan et al., 2007). Insect cell-purified ASK1-TIR1 was incubated with recombinant  
474 His<sub>8</sub>-MBP-IAA7 at a molar ratio of 1:3 and in presence of 0.1 μM indole-3-acetic acid. [<sup>3</sup>H]-  
475 InsP<sub>6</sub> was added to the binding buffer consisting of 50 mM Tris-HCl, pH 7.5, 100 mM NaCl, 10  
476 mM imidazole, 10% (v/v) glycerol, 0.1% (v/v) Tween 20, and 5 mM 2-mercaptoethanol (freshly  
477 added) in a total volume of 0.5 mL. The reaction mixture was then incubated at 4°C for 2 h. Then  
478 30 μL of Ni-NTA resin was added, the reaction was vortexed briefly and incubated further at  
479 4°C for 3 h. A total of 10 mL ice-cold washing buffer (reaction buffer without 2-  
480 mercaptoethanol) was added to individual reactions and after 20 sec Ni-NTA beads were filtered  
481 with 2.4-μm glass fiber filters (25 mm; Whatman Cat No 1822 025) using a filtration system  
482 (model FH225V, Hoefer, San Francisco), before analyzing filter membranes by scintillation  
483 counting. Data collection and evaluation of IC<sub>50</sub> was carried out as described (Laha et al., 2016).

484

#### 485 **Yeast Two-Hybrid Assays**

486 The *Saccharomyces cerevisiae* yeast strain EGY48 (p8opLacZ) (Sheard et al., 2010) was  
487 transformed with pGILDA-*AFB1* or pGILDA-*AFB2* together with pB42AD-*IAA5*, pB42AD-  
488 *IAA5* or pB42AD-*IAA8* constructs (Calderon Villalobos et al., 2012), following the standard  
489 yeast transformation protocol (Gietz et al., 1992). Yeast transformants were selected on solid  
490 CSM media with appropriate supplements lacking uracil, tryptophan and histidine, and spotted in  
491 8-fold serial dilutions onto CSM media with appropriate supplements lacking uracil, tryptophan,  
492 histidine and leucine. For quantification, fresh colonies from independent transformants were  
493 grown overnight in liquid CSM media with appropriate supplements lacking uracil, tryptophan  
494 and histidine. Aux/IAA interactions with AFB1 or 2 in the presence of 1 μM indole-3-acetic acid  
495 were evaluated by quantification of β-galactosidase-mediated hydrolysis of ortho-nitrophenyl-β-  
496 D-galactopyranoside.

497

#### 498 **Protein Extraction and Immunoblots from *Arabidopsis thaliana***

499 For the detection of endogenous TIR1 levels, total proteins were extracted in 6M Urea from 2-  
500 week-old indicated Arabidopsis plants. The extract was centrifuged at 15,000 x g for 10 min at  
501 4°C. The supernatant was mixed with Laemmli loading dye to final 1x. The proteins were  
502 separated on a 7.5% SDS-PAGE, electroblotted onto a PVDF membrane and immunoblot was  
503 performed with anti-TIR1 (Agrisera) or anti-actin (Abiocode) antibodies. Blots were developed  
504 by ECL kit (Biorad) and images acquired using the Alpha imagequant system (GE).  
505 For co-immunoprecipitation assays, 3-week-old *itpk1:ITPK1-G3GFP* transgenic plants were  
506 used. Leaf tissues were homogenized (w/v) in RIPA buffer (5 mM Tris-HCl pH 7.5, 150 mM  
507 NaCl, 10mM MgCl<sub>2</sub>, 1 mM EDTA, 1% NP-40, 1 mM Sodium deoxycholate) containing 1X  
508 plant protease inhibitors (Sigma). The supernatant was clarified through a fine mesh (100 µm)  
509 and centrifuged at 5000 x g for 10 min at 4°C. The supernatant was then pre-cleared for 1 h with  
510 25 µL of IgG agarose beads (Sigma) at 4°C with constant rotation. The beads were collected by  
511 centrifugation and washed three times with RIPA buffer. To the supernatant 25 µL of anti-GFP  
512 agarose beads (Biobharati) were added and kept at rotation overnight at 4°C. On the following  
513 day, the anti-GFP agarose beads were washed as described for the IgG-beads. Both IgG- and  
514 anti-GFP-agarose beads were resuspended in 100 µL of 1x Laemmli loading dye and separated  
515 on 7.5% SDS-PAGE gel. After transfer to a PVDF membrane and blocking, immunoblots were  
516 performed with anti-GFP (Biobharti) or anti-TIR1 antibodies (Agrisera). Images were acquired  
517 as described above.

518

### 519 **Constructs for Transient Expression, BiFC and Co-Immunoprecipitation of Proteins from** 520 *N. benthamiana*

521 *ITPK1* and *TIR1* sequences were amplified from total cDNA from wild-type Col-0 plants. The  
522 primer sequences are shown in Table 1. The amplicons were first cloned into the entry vector  
523 pDONR207 (Thermofisher) using BP Clonase (Invitrogen) and subsequently recombined using  
524 Clonase LR (Invitrogen) into the destination vectors pMDC43 (GFP) (Curtis and Grossniklaus et  
525 al., 2003), HA-pBA, pMDC-nVenus or pMDC-cCFP (Bhattacharjee et al., 2011), as indicated.  
526 The pENTR-GUS plasmid (Invitrogen) was similarly cloned into the BiFC destination vectors  
527 pMDC-nVenus or pMDC-cCFP. Resulting clones were confirmed by sequencing. The binary  
528 vectors were electroporated into the agrobacterium strain GV3101.

529 For BiFC assays, the indicated agrobacterium strains were cultured overnight in LB nutrient  
530 broth containing appropriate antibiotics. The cultures were then pelleted and resuspended in  
531 equal volumes of induction medium (10 mM MgCl<sub>2</sub>, 10 mM MES, pH 5.6) also containing 100  
532 μM acetosyringone (Sigma) and maintained at room temperature for 4 h. Indicated combinations  
533 of agrobacterium suspensions were mixed at similar cell densities and infiltrated into *N.*  
534 *benthamiana* leaves. About 48 hours post infiltration, tissue sections from the infiltrated leaves  
535 were viewed under a SP8 confocal microscope (Leica-microsystems). Images were acquired with  
536 both bright field and YFP filters.

537

### 538 **Elemental Analysis**

539 Whole shoot samples were dried for 48 h at 65°C and digested with nitric acid in  
540 polytetrafluoroethylene vials in a pressurized microwave digestion system (UltraCLAVE IV,  
541 MLS GmbH). Total phosphorus concentrations were analyzed by sector-field high-resolution  
542 inductively coupled plasma mass spectrometry (HR-ICP-MS; ELEMENT 2, Thermo Fisher  
543 Scientific, Germany). Element standards were prepared from certified reference standards from  
544 CPI-International (USA).

545

### 546 **Statistical Analysis**

547 One-way ANOVA analysis followed by a Dunnett's post hoc test on SPSS 24 (IBM), Chi-  
548 squared test and Student's *t*-test were applied for statistical analysis.

549

### 550 **Accession Numbers**

551 Sequence data from this article can be found in the GenBank/EMBL databases under the  
552 following accession numbers: *ITPK1* (At5g16760), *ITPK2* (At4g33770), *ITPK4* (At2G43980),  
553 *PP2AA3* (At1g13320), *IAA19* (At3g15540), *IAA5* (At1g15580), *ARF19* (At1g19220), *IAA29*  
554 (At4g32280), *TIR1* (At3g62980) and  $\beta$ -*TUBULIN* (At5g62700).

555

### 556 **Supplemental Data**

557 The following supplemental materials are available.

558 **Supplemental Figure S1.** Inositol polyphosphate analyses of Arabidopsis *ITPK1* and *ITPK2* T-  
559 DNA insertion lines.

560 **Supplemental Figure S2.** ITPK1 regulates seedling growth and development in Arabidopsis and  
561 a C-terminal GFP Fusion of ITPK1 does not compromise ITPK1 functions.

562 **Supplemental Figure S3.** Plant responses to exogenous auxin are regulated by ITPK1.

563 **Supplemental Figure S4.** Auxin-related growth and developmental processes are not affected in  
564 Arabidopsis *pho2-1* Plants.

565 **Supplemental Figure S5.** Role of ITPK1 in phosphorus accumulation and the effect of auxin.

566 **Supplemental Figure S6.** The *ipk1-1* but not *itpk2-2* mutant is defective in auxin perception.

567 **Supplemental Figure S7.** VIH2-deficient plants are not compromised in auxin perception.

568 **Supplemental Figure S8.** Binding of inositol polyphosphates to the auxin-receptor complex.

569 **Supplemental Figure S9.** 5-InsP<sub>7</sub> potentiates formation of auxin receptor complex *in vivo*.

570 **Supplemental Figure S10.** Stability of TIR1 in *itpk1* plants and structural considerations of  
571 inositol polyphosphate binding of the auxin receptor complex.

572 **Supplemental Table 1.** Primer list

573 **Supplemental References.**

574

## 575 **ACKNOWLEDGEMENTS**

576 We thank Anna. L. Keller, Doris Pätzold, Sven T. Bitters, Brigitte Überbach, and Li Schlüter for  
577 technical assistance, Dr. Kai Eggert for phytohormone analysis and Marília Kamleitner for  
578 helpful suggestions and critically reading. We thank Tsuyoshi Nakagawa for Gateway binary  
579 vectors. We are grateful to Claudia Oecking for providing us with <sup>3</sup>H-IAA. We are also thankful  
580 to Sheng Yang He, John Withers and Luz Irina Calderón Villalobos for providing us with the  
581 yeast EGY48 strain and several pGILDA, pB42AD constructs. This work was funded by grants  
582 from the Deutsche Forschungsgemeinschaft (SCHA 1274/4-1, SCHA 1274/5-1, Research  
583 Training Group GRK 2064 and under Germany's Excellence Strategy – EXC 2070 – 390732324,  
584 PhenoRob to G.S.; and CIBSS – EXC 2189 – 390939984 as well as JE 572/4-1 to H.J.J.). D.L.  
585 acknowledges the Deutsche Forschungsgemeinschaft (LA 4541/1-1) for a Research Fellowship.  
586 H.G. and Y.W.D. are supported by DBT-JRF and DBT-YI fellowships, respectively. S.B. is  
587 supported by funds from DBT-Ramalingaswami Re-Entry Fellowship. A.S. is supported by the  
588 MRC/UCL Laboratory for Molecular Cell Biology University Unit (MC\_UU\_12018/4). Z.H.S.

589 was supported by a scholarship from the Iran Ministry of Science, Research and Technology.

590 N.Z. is a Howard Hughes Medical Institute Investigator.

591 The authors declare no competing interests.

592

## 593 REFERENCES

- 594 **Aung K, Lin SI, Wu CC, Huang YT, Su CL, Chiou TJ** (2006) *pho2*, a phosphate overaccumulator, is caused by a  
595 nonsense mutation in a MicroRNA399 target gene. *Plant Physiology* **141**: 1000-1011
- 596 **Azevedo C, Saiardi A** (2006) Extraction and analysis of soluble inositol polyphosphates from yeast. *Nat Protoc* **1**:  
597 2416-2422
- 598 **Bari R, Pant BD, Stitt M, Scheible WR** (2006) *PHO2*, *microRNA399*, and *PHR1* define a phosphate-signaling  
599 pathway in plants. *Plant Physiology* **141**: 988-999
- 600 **Bellstaedt J, Trenner J, Lippmann R, Poeschl Y, Zhang XX, Friml J, Quint M, Delker C** (2019) A Mobile  
601 Auxin Signal Connects Temperature Sensing in Cotyledons with Growth Responses in Hypocotyls. *Plant*  
602 *Physiology* **180**: 757-766
- 603 **Bishopp A, Help H, El-Showk S, Weijers D, Scheres B, Friml J, Benkova E, Mahonen AP, Helariutta Y**  
604 (2011) A mutually inhibitory interaction between auxin and cytokinin specifies vascular pattern in roots.  
605 *Curr Biol* **21**: 917-926
- 606 **Blüher D, Laha D, Thieme S, Hofer A, Eschen-Lippold L, Masch A, Balcke G, Pavlovic I, Nagel O, Schonsky**  
607 **A, Hinkelmann R, Wörner J, Parvin N, Greiner R, Weber S, Tissier A, Schutkowski M, Lee J, Jessen**  
608 **H, Schaaf G, Bonas U** (2017) A 1-phytase type III effector interferes with plant hormone signaling. *Nature*  
609 *Communications* **8**: 2159
- 610 **Brearley CA, Hanke DE** (1996) Inositol phosphates in barley (*Hordeum vulgare* L.) aleurone tissue are  
611 stereochemically similar to the products of breakdown of *InsP6* in vitro by wheat-bran phytase. *Biochem J*  
612 **318 ( Pt 1)**: 279-286
- 613 **Calderon Villalobos LI, Lee S, De Oliveira C, Ivetac A, Brandt W, Armitage L, Sheard LB, Tan X, Parry G,**  
614 **Mao H, Zheng N, Napier R, Kepinski S, Estelle M** (2012) A combinatorial TIR1/AFB-Aux/IAA co-  
615 receptor system for differential sensing of auxin. *Nat Chem Biol* **8**: 477-485
- 616 **Couso I, Evans B, Li J, Liu Y, Ma F, Diamond S, Allen DK, Umen JG** (2016) Synergism between inositol  
617 polyphosphates and TOR kinase signaling in nutrient sensing, growth control and lipid metabolism in  
618 *Chlamydomonas*. *Plant Cell*
- 619 **Delbarre A, Muller P, Imhoff V, Guern J** (1996) Comparison of mechanisms controlling uptake and accumulation  
620 of 2,4-dichlorophenoxy acetic acid, naphthalene-1-acetic acid, and indole-3-acetic acid in suspension-  
621 cultured tobacco cells. *Planta* **198**: 532-541
- 622 **Delhaize E, Randall PJ** (1995) Characterization of a Phosphate-Accumulator Mutant of *Arabidopsis-Thaliana*.  
623 *Plant Physiology* **107**: 207-213
- 624 **Desai M, Rangarajan P, Donahue JL, Williams SP, Land ES, Mandal MK, Phillippy BQ, Perera IY, Raboy**  
625 **V, Gillaspay GE** (2014) Two inositol hexakisphosphate kinases drive inositol pyrophosphate synthesis in  
626 plants. *Plant J* **80**: 642-653
- 627 **Dharmasiri N, Dharmasiri S, Estelle M** (2005) The F-box protein TIR1 is an auxin receptor. *Nature* **435**: 441-445
- 628 **Dhondt S, Van Haerenborgh D, Van Cauwenbergh C, Merks RM, Philips W, Beemster GT, Inze D** (2012)  
629 Quantitative analysis of venation patterns of *Arabidopsis* leaves by supervised image analysis. *Plant J* **69**:  
630 553-563
- 631 **Dinesh DC, Villalobos LIAC, Abel S** (2016) Structural Biology of Nuclear Auxin Action. *Trends in Plant Science*  
632 **21**: 302-316
- 633 **Dong J, Ma G, Sui L, Wei M, Satheesh V, Zhang R, Ge S, Li J, Zhang TE, Wittwer C, Jessen HJ, Zhang H,**  
634 **An GY, Chao DY, Liu D, Lei M** (2019) Inositol Pyrophosphate *InsP8* Acts as an Intracellular Phosphate  
635 Signal in *Arabidopsis*. *Mol Plant* **12**: 1463-1473
- 636 **Dorsch JA, Cook A, Young KA, Anderson JM, Bauman AT, Volkmann CJ, Murthy PP, Raboy V** (2003) Seed  
637 phosphorus and inositol phosphate phenotype of barley low phytic acid genotypes. *Phytochemistry* **62**:  
638 691-706
- 639 **Draskovic P, Saiardi A, Bhandari R, Burton A, Ilc G, Kovacevic M, Snyder SH, Podobnik M** (2008) Inositol  
640 hexakisphosphate kinase products contain diphosphate and triphosphate groups. *Chem Biol* **15**: 274-286
- 641 **Eggert K, von Wiren N** (2017) Response of the plant hormone network to boron deficiency. *New Phytol* **216**: 868-  
642 881
- 643 **Flores S, Smart CC** (2000) Abscisic acid-induced changes in inositol metabolism in *Spirodela polyrrhiza*. *Planta*  
644 **211**: 823-832
- 645 **Fukuda H, Komamine A** (1980) Establishment of an Experimental System for the Study of Tracheary Element  
646 Differentiation from Single Cells Isolated from the Mesophyll of *Zinnia-Elegans*. *Plant Physiology* **65**: 57-  
647 60



- 648 **Gietz D, St Jean A, Woods RA, Schiestl RH** (1992) Improved method for high efficiency transformation of intact  
649 yeast cells. *Nucleic Acids Res* **20**: 1425
- 650 **Gray WM, Kepinski S, Rouse D, Leyser O, Estelle M** (2001) Auxin regulates SCF(TIR1)-dependent degradation  
651 of AUX/IAA proteins. *Nature* **414**: 271-276
- 652 **Gutierrez-Alanis D, Ojeda-Rivera JO, Yong-Villalobos L, Cardenas-Torres L, Herrera-Estrella L** (2018)  
653 Adaptation to Phosphate Scarcity: Tips from Arabidopsis Roots. *Trends in Plant Science* **23**: 721-730
- 654 **Hartmann FP, Barbier de Reuille P, Kuhlemeier C** (2019) Toward a 3D model of phyllotaxis based on a  
655 biochemically plausible auxin-transport mechanism. *PLoS Comput Biol* **15**: e1006896
- 656 **Hegemann JH, Heick SB** (2011) Delete and repeat: a comprehensive toolkit for sequential gene knockout in the  
657 budding yeast *Saccharomyces cerevisiae*. *Methods Mol Biol* **765**: 189-206
- 658 **Jönsson H, Heisler MG, Shapiro BE, Meyerowitz EM, Mjolsness E** (2006) An auxin-driven polarized transport  
659 model for phyllotaxis. *Proc Natl Acad Sci U S A* **103**: 1633-1638
- 660 **Kepinski S, Leyser O** (2005) The Arabidopsis F-box protein TIR1 is an auxin receptor. *Nature* **435**: 446-451
- 661 **Kuo HF, Chang TY, Chiang SF, Wang WD, Charng YY, Chiou TJ** (2014) Arabidopsis inositol  
662 pentakisphosphate 2-kinase, AtIPK1, is required for growth and modulates phosphate homeostasis at the  
663 transcriptional level. *Plant Journal* **80**: 503-515
- 664 **Kuo HF, Hsu YY, Lin WC, Chen KY, Munnik T, Brearley CA, Chiou TJ** (2018) Arabidopsis inositol phosphate  
665 kinases IPK1 and ITPK1 constitute a metabolic pathway in maintaining phosphate homeostasis. *Plant J*
- 666 **Laha D, Johnen P, Azevedo C, Dynowski M, Weiss M, Capolicchio S, Mao HB, Iven T, Steenbergen M,  
667 Freyer M, Gaugler P, de Campos MKF, Zheng N, Feussner I, Jessen HJ, Van Wees SCM, Saiardi A,  
668 Schaaf G** (2015) VIH2 Regulates the Synthesis of Inositol Pyrophosphate InsP(8) and Jasmonate-  
669 Dependent Defenses in Arabidopsis. *Plant Cell* **27**: 1082-1097
- 670 **Laha D, Parvin N, Dynowski M, Johnen P, Mao HB, Bitters ST, Zheng N, Schaaf G** (2016) Inositol  
671 Polyphosphate Binding Specificity of the Jasmonate Receptor Complex. *Plant Physiology* **171**: 2364-2370
- 672 **Laha D, Parvin N, Hofer A, Giehl RFH, Fernandez-Rebollo N, von Wiren N, Saiardi A, Jessen HJ, Schaaf G**  
673 (2019) Arabidopsis ITPK1 and ITPK2 Have an Evolutionarily Conserved Phytic Acid Kinase Activity. *ACS*  
674 *Chemical Biology* **14**: 2127-2133
- 675 **Lavenus J, Goh T, Roberts I, Guyomarc'h S, Lucas M, De Smet I, Fukaki H, Beeckman T, Bennett M,  
676 Laplace L** (2013) Lateral root development in Arabidopsis: fifty shades of auxin. *Trends Plant Sci* **18**: 450-  
677 458
- 678 **Lin H, Fridy PC, Ribeiro AA, Choi JH, Barma DK, Vogel G, Falck JR, Shears SB, York JD, Mayr GW**  
679 (2009) Structural analysis and detection of biological inositol pyrophosphates reveal that the family of  
680 VIP/diphosphoinositol pentakisphosphate kinases are 1/3-kinases. *J Biol Chem* **284**: 1863-1872
- 681 **Lincoln C, Britton JH, Estelle M** (1990) Growth and development of the *axr1* mutants of Arabidopsis. *Plant Cell*  
682 **2**: 1071-1080
- 683 **Losito O, Sziygyarto Z, Resnick AC, Saiardi A** (2009) Inositol pyrophosphates and their unique metabolic  
684 complexity: analysis by gel electrophoresis. *PLoS ONE* **4**: e5580
- 685 **Lv QD, Zhong YJ, Wang YG, Zhang L, Shi J, Wu ZC, Liu Y, Mao CZ, Yi KK, Wu P** (2014) SPX4 Negatively  
686 Regulates Phosphate Signaling and Homeostasis through Its Interaction with PHR2 in Rice. *Plant Cell* **26**:  
687 1586-1597
- 688 **Menniti FS, Miller RN, Putney JW, Jr., Shears SB** (1993) Turnover of inositol polyphosphate pyrophosphates in  
689 pancreaticoma cells. *J Biol Chem* **268**: 3850-3856
- 690 **Mulugu S, Bai W, Fridy PC, Bastidas RJ, Otto JC, Dollins DE, Haystead TA, Ribeiro AA, York JD** (2007) A  
691 conserved family of enzymes that phosphorylate inositol hexakisphosphate. *Science* **316**: 106-109
- 692 **Nakagawa T, Suzuki T, Murata S, Nakamura S, Hino T, Maeo K, Tabata R, Kawai T, Tanaka K, Niwa Y,  
693 Watanabe Y, Nakamura K, Kimura T, Ishiguro S** (2007) Improved Gateway binary vectors: high-  
694 performance vectors for creation of fusion constructs in transgenic analysis of plants. *Biosci Biotechnol*  
695 *Biochem* **71**: 2095-2100
- 696 **Onnebo SM, Saiardi A** (2009) Inositol pyrophosphates modulate hydrogen peroxide signalling. *Biochem J* **423**:  
697 109-118
- 698 **Prigge MJ, Platre M, Kadakia N, Zhang Y, Greenham K, Szutu W, Pandey BK, Bhosale RA, Bennett MJ,  
699 Busch W, Estelle M** (2020) Genetic analysis of the Arabidopsis TIR1/AFB auxin receptors reveals both  
700 overlapping and specialized functions. *Elife* **9**
- 701 **Puga MI, Mateos I, Charukesi R, Wang Z, Franco-Zorrilla JM, de Lorenzo L, Irigoye ML, Masiero S, Bustos  
702 R, Rodriguez J, Leyva A, Rubio V, Sommer H, Paz-Ares J** (2014) SPX1 is a phosphate-dependent



- 703 inhibitor of PHOSPHATE STARVATION RESPONSE 1 in Arabidopsis. Proceedings of the National  
704 Academy of Sciences of the United States of America **111**: 14947-14952
- 705 **Quint M, Delker C, Franklin KA, Wigge PA, Halliday KJ, van Zanten M** (2016) Molecular and genetic control  
706 of plant thermomorphogenesis. *Nature Plants* **2**
- 707 **Rao F, Cha JY, Xu J, Xu RS, Vandiver MS, Tyagi R, Tokhunts R, Koldobskiy MA, Fu CL, Barrow R, Wu**  
708 **MX, Fiedler D, Barrow JC, Snyder SH** (2014) Inositol Pyrophosphates Mediate the DNA-PK/ATM-p53  
709 Cell Death Pathway by Regulating CK2 Phosphorylation of Tti1/Tel2. *Molecular Cell* **54**: 119-132
- 710 **Reinhardt D, Pesce ER, Stieger P, Mandel T, Baltensperger K, Bennett M, Traas J, Friml J, Kuhlemeier C**  
711 (2003) Regulation of phyllotaxis by polar auxin transport. *Nature* **426**: 255-260
- 712 **Ruegger M, Dewey E, Gray WM, Hobbie L, Turner J, Estelle M** (1998) The TIR1 protein of Arabidopsis  
713 functions in auxin response and is related to human SKP2 and yeast Grr1p. *Genes & Development* **12**: 198-  
714 207
- 715 **Ruegger M, Dewey E, Gray WM, Hobbie L, Turner J, Estelle M** (1998) The TIR1 protein of Arabidopsis  
716 functions in auxin response and is related to human SKP2 and yeast grr1p. *Genes Dev* **12**: 198-207
- 717 **Saiardi A, Erdjument-Bromage H, Snowman AM, Tempst P, Snyder SH** (1999) Synthesis of diphosphoinositol  
718 pentakisphosphate by a newly identified family of higher inositol polyphosphate kinases. *Curr Biol* **9**:  
719 1323-1326
- 720 **Salehin M, Bagchi R, Estelle M** (2015) SCFTIR1/AFB-based auxin perception: mechanism and role in plant  
721 growth and development. *Plant Cell* **27**: 9-19
- 722 **Scarpella E, Marcos D, Friml J, Berleth T** (2006) Control of leaf vascular patterning by polar auxin transport.  
723 *Genes Dev* **20**: 1015-1027
- 724 **Scarpella E, Marcos D, Friml J, Berleth T** (2006) Control of leaf vascular patterning by polar auxin transport.  
725 *Genes & Development* **20**: 1015-1027
- 726 **Schaaf G, Betts L, Garrett TA, Raetz CR, Bankaitis VA** (2006) Crystallization and preliminary X-ray diffraction  
727 analysis of phospholipid-bound Sfh1p, a member of the *Saccharomyces cerevisiae* Sec14p-like  
728 phosphatidylinositol transfer protein family. *Acta Crystallogr Sect F Struct Biol Cryst Commun* **62**: 1156-  
729 1160
- 730 **Sheard LB, Tan X, Mao H, Withers J, Ben-Nissan G, Hinds TR, Kobayashi Y, Hsu FF, Sharon M, Browse J,**  
731 **He SY, Rizo J, Howe GA, Zheng N** (2010) Jasmonate perception by inositol-phosphate-potentiated COI1-  
732 JAZ co-receptor. *Nature* **468**: 400-405
- 733 **Shears SB** (2017) Intimate Connections: Inositol Pyrophosphates at the Interface of Metabolic Regulation and Cell-  
734 Signaling. *J Cell Physiol*
- 735 **Sieburth LE** (1999) Auxin is required for leaf vein pattern in Arabidopsis. *Plant Physiology* **121**: 1179-1190
- 736 **Smetana O, Makila R, Lyu M, Amiryousefi A, Sanchez Rodriguez F, Wu MF, Sole-Gil A, Leal Gavarron M,**  
737 **Siligato R, Miyashima S, Roszak P, Blomster T, Reed JW, Broholm S, Mahonen AP** (2019) High  
738 levels of auxin signalling define the stem-cell organizer of the vascular cambium. *Nature* **565**: 485-489
- 739 **Stevenson-Paulik J, Bastidas RJ, Chiou ST, Frye RA, York JD** (2005) Generation of phytate-free seeds in  
740 Arabidopsis through disruption of inositol polyphosphate kinases. *Proc Natl Acad Sci U S A* **102**: 12612-  
741 12617
- 742 **Stiles AR, Qian X, Shears SB, Grabau EA** (2008) Metabolic and signaling properties of an Itpk gene family in  
743 Glycine max. *FEBS Lett* **582**: 1853-1858
- 744 **Sweetman D, Stavridou I, Johnson S, Green P, Caddick SE, Brearley CA** (2007) Arabidopsis thaliana inositol  
745 1,3,4-trisphosphate 5/6-kinase 4 (AtITPK4) is an outlier to a family of ATP-grasp fold proteins from  
746 Arabidopsis. *FEBS Lett* **581**: 4165-4171
- 747 **Tan X, Calderon-Villalobos LI, Sharon M, Zheng C, Robinson CV, Estelle M, Zheng N** (2007) Mechanism of  
748 auxin perception by the TIR1 ubiquitin ligase. *Nature* **446**: 640-645
- 749 **Teale WD, Paponov IA, Palme K** (2006) Auxin in action: signalling, transport and the control of plant growth and  
750 development. *Nature Reviews Molecular Cell Biology* **7**: 847-859
- 751 **Thota SG, Unnikannan CP, Thampatty SR, Manorama R, Bhandari R** (2015) Inositol pyrophosphates regulate  
752 RNA polymerase I-mediated rRNA transcription in *Saccharomyces cerevisiae*. *Biochem J* **466**: 105-114
- 753 **Wang RH, Zhang Y, Kieffer M, Yu H, Kepinski S, Estelle M** (2016) HSP90 regulates temperature-dependent  
754 seedling growth in Arabidopsis by stabilizing the auxin co-receptor F-box protein TIR1. *Nature*  
755 *Communications* **7**
- 756 **Wang ZY, Ruan WY, Shi J, Zhang L, Xiang D, Yang C, Li CY, Wu ZC, Liu Y, Yu YA, Shou HX, Mo XR,**  
757 **Mao CZ, Wu P** (2014) Rice SPX1 and SPX2 inhibit phosphate starvation responses through interacting

758 with PHR2 in a phosphate-dependent manner. Proceedings of the National Academy of Sciences of the  
759 United States of America **111**: 14953-14958  
760 **Weijers D, Wagner D** (2016) Transcriptional Responses to the Auxin Hormone. Annu Rev Plant Biol **67**: 539-574  
761 **Wild R, Gerasimaite R, Jung JY, Truffault V, Pavlovic I, Schmidt A, Saiardi A, Jessen HJ, Poirier Y,**  
762 **Hothorn M, Mayer A** (2016) Control of eukaryotic phosphate homeostasis by inositol polyphosphate  
763 sensor domains. Science  
764 **Wilson MS, Jessen HJ, Saiardi A** (2019) The inositol hexakisphosphate kinases IP6K1 and-2 regulate human  
765 cellular phosphate homeostasis, including XPR1-mediated phosphate export. Journal of Biological  
766 Chemistry **294**: 11597-11608  
767 **Wilson MSC, Bulley SJ, Pisani F, Irvine RF, Saiardi A** (2015) A novel method for the purification of inositol  
768 phosphates from biological samples reveals that no phytate is present in human plasma or urine. Open  
769 Biology **5**  
770 **Wilson MSC, Livermore TM, Saiardi A** (2013) Inositol pyrophosphates: between signalling and metabolism.  
771 Biochemical Journal **452**: 369-379  
772 **Zhu J, Lau K, Puschmann R, Harmel RK, Zhang YJ, Pries V, Gaugler P, Broger L, Dutta AK, Jessen HJ,**  
773 **Schaaf G, Fernie AR, Hothorn LA, Fiedler D, Hothorn M** (2019) Two bifunctional inositol  
774 pyrophosphate kinases/phosphatases control plant phosphate homeostasis. Elife **8**

775

776

## 777 **FIGURE LEGENDS**

778

779 **Figure 1.** *ITPK1* and *ITPK2* are ubiquitously expressed and *itpk1* mutant plants display  
780 pleiotropic defects in inositol polyphosphate and inositol pyrophosphate homeostasis.

781

782 **(A)** Expression analyses of Arabidopsis *ITPK1* and *ITPK2*. qPCR analyses of *ITPK1* and *ITPK2*  
783 using cDNA prepared from RNA extracts of different tissues of wild-type Col-0 plants. Error  
784 bars represent standard deviation (s.d.), n=3. *PP2AA3* was used as reference gene.

785 **(B)** SAX-HPLC profiles of extracts of 3-week-old [<sup>3</sup>H] inositol-labeled wild-type (Col-0, solid  
786 black line) and *itpk1* mutant (solid red line) seedlings. Activities obtained by scintillation  
787 counting of fractions containing the InsP<sub>2</sub>-InsP<sub>8</sub> peaks are shown.

788 **(C)** A zoom in into the SAX-HPLC profiles of (B). The InsP<sub>6</sub>-InsP<sub>8</sub> region is presented with  
789 arrows. The isomeric nature of InsP<sub>3</sub>[<sub>a-c</sub>], InsP<sub>4</sub>[<sub>a,b</sub>] is not yet solved. Based on published  
790 chromatographs (Stevenson-Paulik et al., 2005; Laha et al., 2015), InsP<sub>5a</sub> corresponds to InsP<sub>5</sub>  
791 [2-OH], InsP<sub>5b</sub> represents InsP<sub>5</sub> [4/6-OH] and InsP<sub>5c</sub> corresponds to InsP<sub>5</sub> [1-OH] or its  
792 enantiomer InsP<sub>5</sub> [3-OH].

793 **(D)** Inositol polyphosphate enrichment from indicated plant extracts by TiO<sub>2</sub> pulldown. Inositol  
794 polyphosphates were eluted from TiO<sub>2</sub> beads, separated by PAGE and visualized by Toluidine  
795 blue.

796 **(E)** Relative amounts of different inositol polyphosphates of 3-week old [<sup>3</sup>H] inositol-labeled  
797 seedlings. InsP<sub>3b</sub>, InsP<sub>4a</sub>, InsP<sub>5a</sub>, InsP<sub>5c</sub> and InsP<sub>8</sub> are presented as percentage of total inositol  
798 phosphates. InsP<sub>6</sub> and InsP<sub>7</sub> are presented as ratio to their precursor InsP<sub>5a</sub>. Error bars represent  
799 standard errors (s.e.m.), n=2. The experiment was repeated independently with similar results.  
800

801 **Figure 2.** Loss of ITPK1 results in auxin signaling defects.

802  
803 **(A)** Analysis of leaf vascular differentiation. Venation patterns were recorded from 13-day-old  
804 seedlings of the indicated genotypes. Error bars depict s.e.m, n=6-10. The experiment was  
805 repeated twice with similar results. Letters depict significance in one-way analysis of variance  
806 (ANOVA) (a and b,  $P < 0.005$ ).

807 **(B)** Root gravitropism of 12-day-old seedlings. Indicated genotypes were rotated by 90° and  
808 gravitropic curvatures were measured after 16 h. The percentage of seedlings in each category  
809 are represented by the length of the bar. The distribution of data was analyzed using  $\chi^2$  test  
810 (number of seedlings  $n \geq 36$ , groups contained at least 7.5% of total seedlings per genotype).  
811 Significant differences ( $P < 0.0001$ ) are indicated by different letters. The experiment was  
812 performed independently with similar results.

813 **(C)** Relative root elongation of designated genotypes under increasing IAA concentrations. 6-  
814 day-old seedlings were transferred to MS plates supplemented with 0, 25 and 75 nM IAA and  
815 incubated for 7 days. Root lengths were evaluated by ImageJ. Error bars are s.e.m, n=10-35.  
816 Different letters indicate significance in one-way analysis of variance (ANOVA) (a and b,  $P <$   
817  $0.05$ ; a to c,  $P < 0.001$ ; a to d,  $P < 0.001$ ; b to c,  $P < 0.001$ ; d and e,  $P < 0.001$ ; b to d,  $P < 0.001$ ;  
818 c to e,  $P < 0.001$ ). The experiment was repeated twice with similar results.

819 **(D)** Primary root length analysis of designated genotypes grown at higher temperature. 5-day-old  
820 seedlings were kept at 22°C or shifted to 29°C. Root length was evaluated after 8 days by  
821 ImageJ. Error bars represent s.e.m,  $n \geq 17$ . Letters depict significance in one-way ANOVA (a

822 and b,  $P < 0.005$ ; a to c,  $P < 0.001$ ; b to c,  $P < 0.001$ ). The experiment was repeated  
823 independently with similar results.

824 **(E)** Auxin levels in shoot and roots of 2-week-old seedlings of designated genotypes grown on  
825 sterile MS media. Error bars represent s.e.m,  $n \geq 7$ . The experiment was repeated with similar  
826 results.

827 **(F)** Polar auxin transport. The apical end of excised stems of designated genotypes were placed  
828 in liquid MS media supplemented with [ $^3\text{H}$ ] IAA. After indicated times of incubation, the basal  
829 ends of the labelled stems were excised and the activity was determined by scintillation counting.  
830 Error bars represent s.e.m,  $n=3$ . Genotypes in all panels are as indicated. The term “compl. line”  
831 refers to the *itpk1* T-DNA insertion line transformed with a genomic fragment containing a 1839-  
832 bp region upstream of the *ITPK1* start codon in translational fusion with a C-terminal G3GFP.

833 **Figure 3.** The *itpk4-1* plants are compromised in InsP<sub>6</sub> but not in InsP<sub>7</sub> synthesis and behave like  
834 wild-type Col-0 plants with respect to auxin-related processes.

835  
836 **(A)** SAX-HPLC profiles of extracts of [ $^3\text{H}$ ] inositol-labeled wild-type (Col-0, solid black line)  
837 and *itpk4-1* seedlings (solid red line). **(B)** Zoom-in into the SAX-HPLC profile of (A). **(C)**  
838 Relative amounts of different inositol polyphosphates in the respective genotypes are presented.  
839 Error bars represent  $\pm$  s.e.,  $n=2$ . The experiment was repeated independently with similar results.  
840 **(D)** Relative root elongation of seedlings of designated genotypes treated with IAA. Seeds were  
841 surface sterilized and sown on sterile solid 0.5 x MS, 1 % sucrose media. After 2 days of  
842 stratification, germinated seedlings were allowed to grow for 6 days and transferred to solid MS  
843 media supplemented with or without 100 nM IAA. Root lengths were evaluated by ImageJ after  
844 another 5 days of growth. Data are means  $\pm$  s.e.,  $n=32-64$ .

845  
846 **Figure 4.** Higher inositol polyphosphates bind to the auxin receptor complex with higher  
847 affinities.

848 Concentration-dependent competitive binding of [ $^3\text{H}$ ]-InsP<sub>6</sub> to the ASK1-TIR1-Aux/IAA-IAA  
849 receptor complex in the presence of different unlabeled inositol polyphosphate species. Error  
850 bars represent s.e.,  $n=2$ .

851 **Figure 5.** Inositol pyrophosphate 5-InsP<sub>7</sub> activates auxin-receptor complex formation in yeast.

852

853 **(A)** HPLC profiles of extracts of [<sup>3</sup>H] inositol-labeled wild-type and a *vip1Δ* yeast strains. Note  
854 that 5-InsP<sub>7</sub> levels are specifically elevated in the *vip1Δ* yeast mutant. Extracts of designated  
855 strains were resolved by Partisphere SAX- HPLC. The full HPLC profile is presented in  
856 Supplemental Figure 9A.

857 **(B, C)** Yeast two-hybrid (Y2H) assays to evaluate AFB1 and AFB2 interaction with different  
858 Aux/IAA repressors in isogenic *VIP1* and *vip1Δ* yeast strains. AFB1-Aux/IAA interactions in the  
859 presence of 1 μM IAA were quantified by β-galactosidase-mediated hydrolysis of ortho-  
860 nitrophenyl-b-D-galactopyranoside. Error bars depict s.e.m., n=3.

861

862 **Figure 6.** Arabidopsis ITPK1 physically interacts with TIR1.

863

864 **(A)** Enrichment of TIR1 from *itpk1: ITPK1-G3GFP* transgenic plants. Total extracts from 4-  
865 week-old plants were immuno-enriched with either IgG- (control) or anti-GFP-conjugated  
866 agarose beads. Bound proteins were immunoblotted with anti-GFP or anti-TIR1 antibodies. Left  
867 panels indicate immunoblots of ITPK1-GFP or TIR1 in the input extracts. Right panel lanes are  
868 immunoblots of ITPK1-GFP and TIR1 for IgG- or anti-GFP immuno-enriched samples.

869

870 **(B)** Transiently expressed ITPK1 interacts with TIR1 in the nucleus of *N. benthamiana* cells.  
871 Bi-molecular fluorescence complementation (BiFC) to detect interaction of ITPK1 with TIR1.  
872 Agrobacterium strains expressing indicated nVenus- or cCFP-tagged ITPK1, TIR1 or GUS  
873 (control) were combinatorially co-expressed in *N. benthamiana* leaves. At 2-days-post-  
874 infiltration (dpi), tissue sections were visualized under a laser confocal microscope. Interaction  
875 and nuclear localization of ITPK1 with TIR1 in reciprocal BiFC combinations is shown (top  
876 row). Lack of detectable YFP fluorescence in any BiFC combinations of ITPK1 or TIR1 with  
877 GUS (bottom two rows) is also shown. Images are presented as YFP fluorescence (YFP filter)  
878 and merge of bright field of the same section with YFP fluorescence (brightfield + YFP filter).  
879 The combinations of nVenus- and cCFP-expressing constructs for the corresponding images are  
880 shown in left. Scale bar = 50 μm.

Figure 1

bioRxiv preprint doi: <https://doi.org/10.1101/2020.04.23.058487>; this version posted April 25, 2020. The copyright holder for this preprint (which was not certified by peer review) is the author/funder, who has granted bioRxiv a license to display the preprint in perpetuity. It is made available under aCC-BY-ND 4.0 International license.

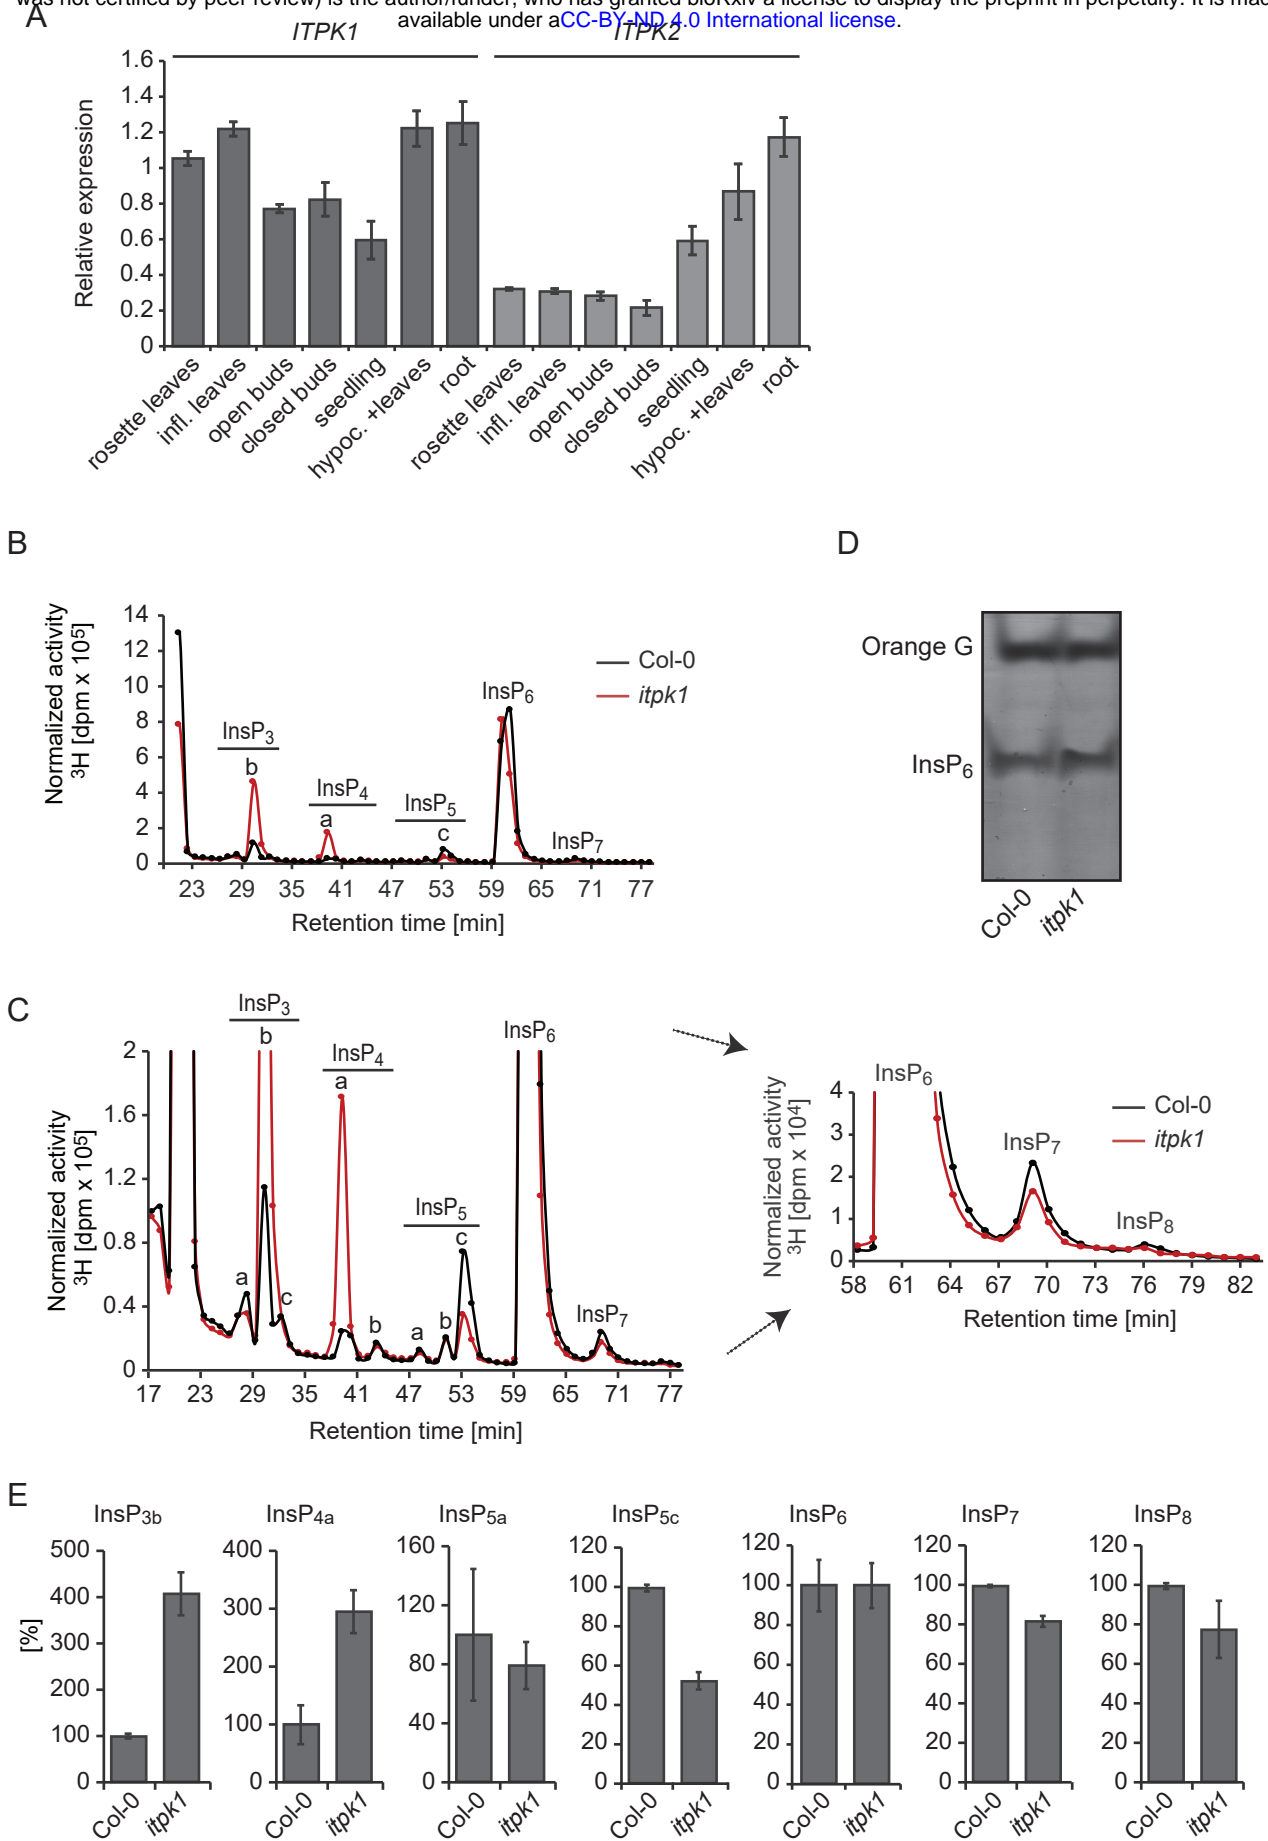

Figure 2

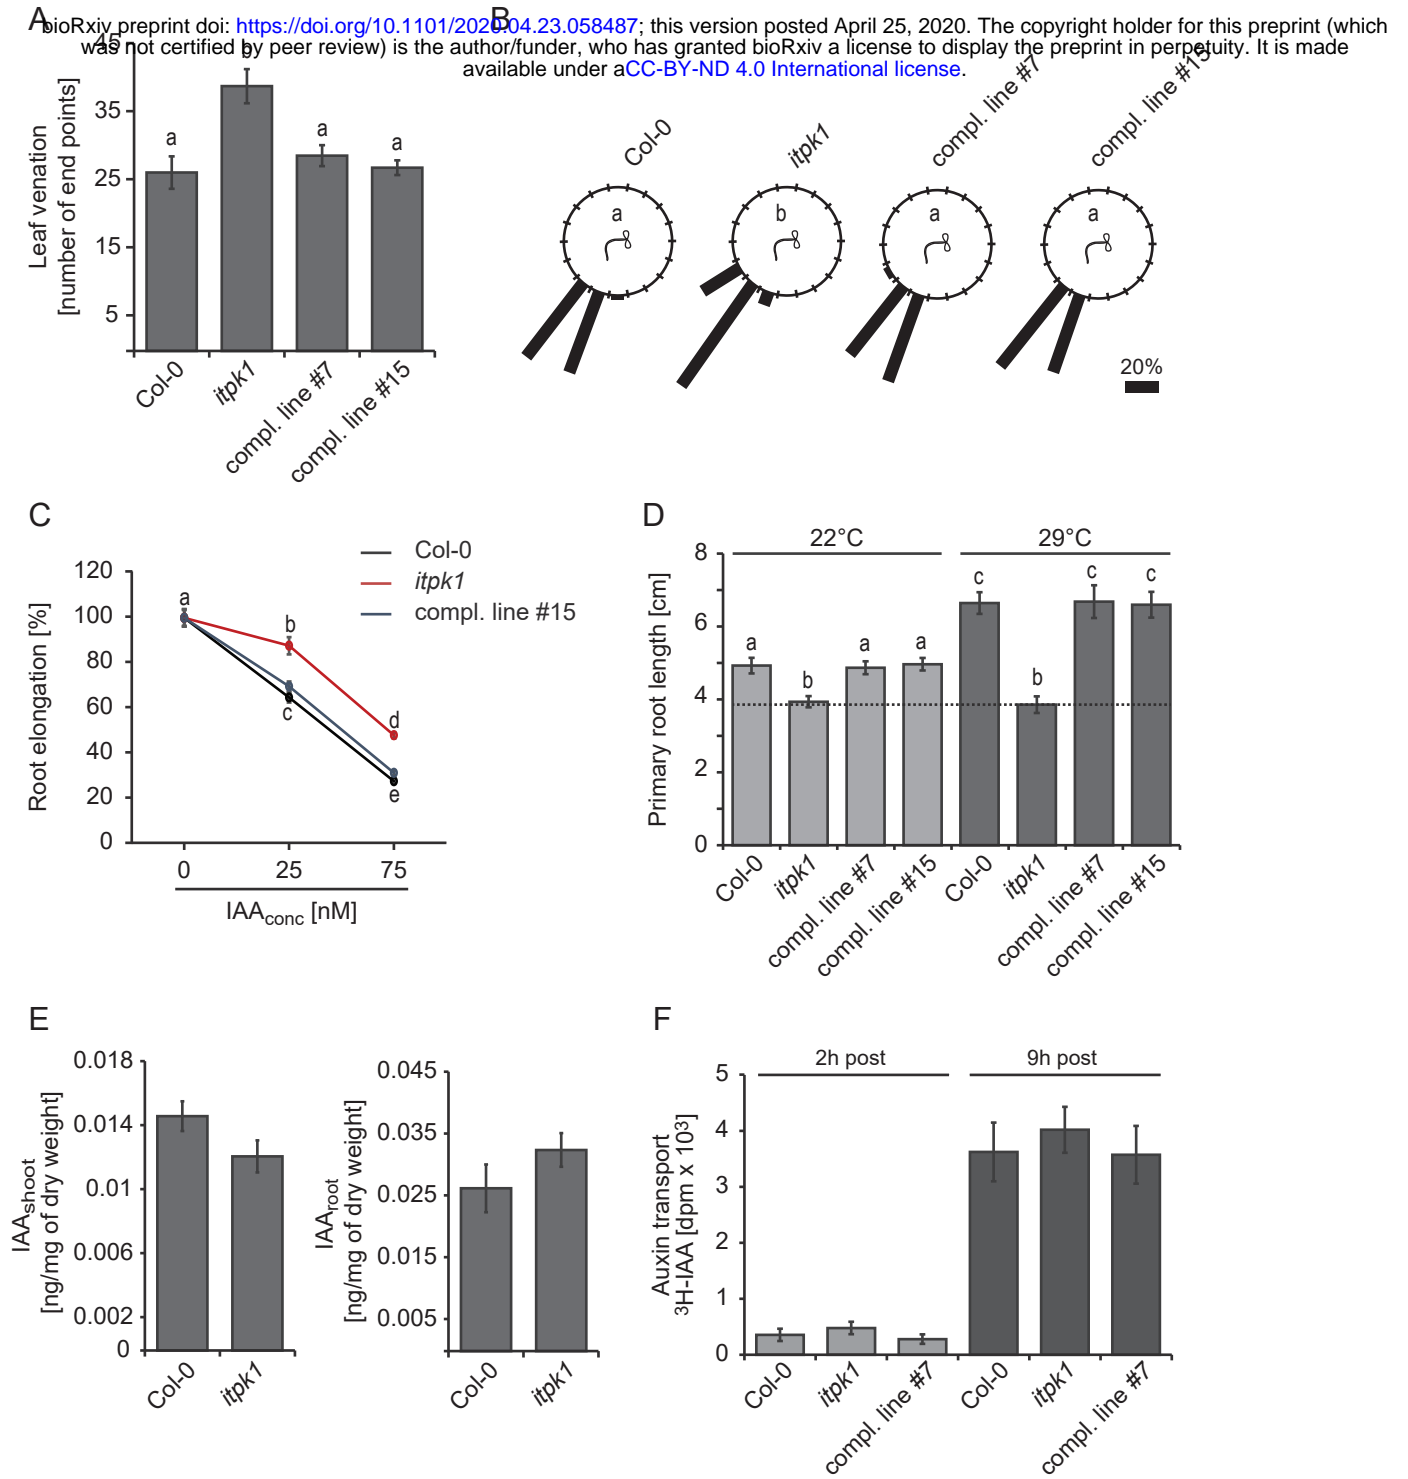



Figure 3

bioRxiv preprint doi: <https://doi.org/10.1101/2020.04.23.058487>; this version posted April 25, 2020. The copyright holder for this preprint (which was not certified by peer review) is the author/funder, who has granted bioRxiv a license to display the preprint in perpetuity. It is made available under aCC-BY-ND 4.0 International license.

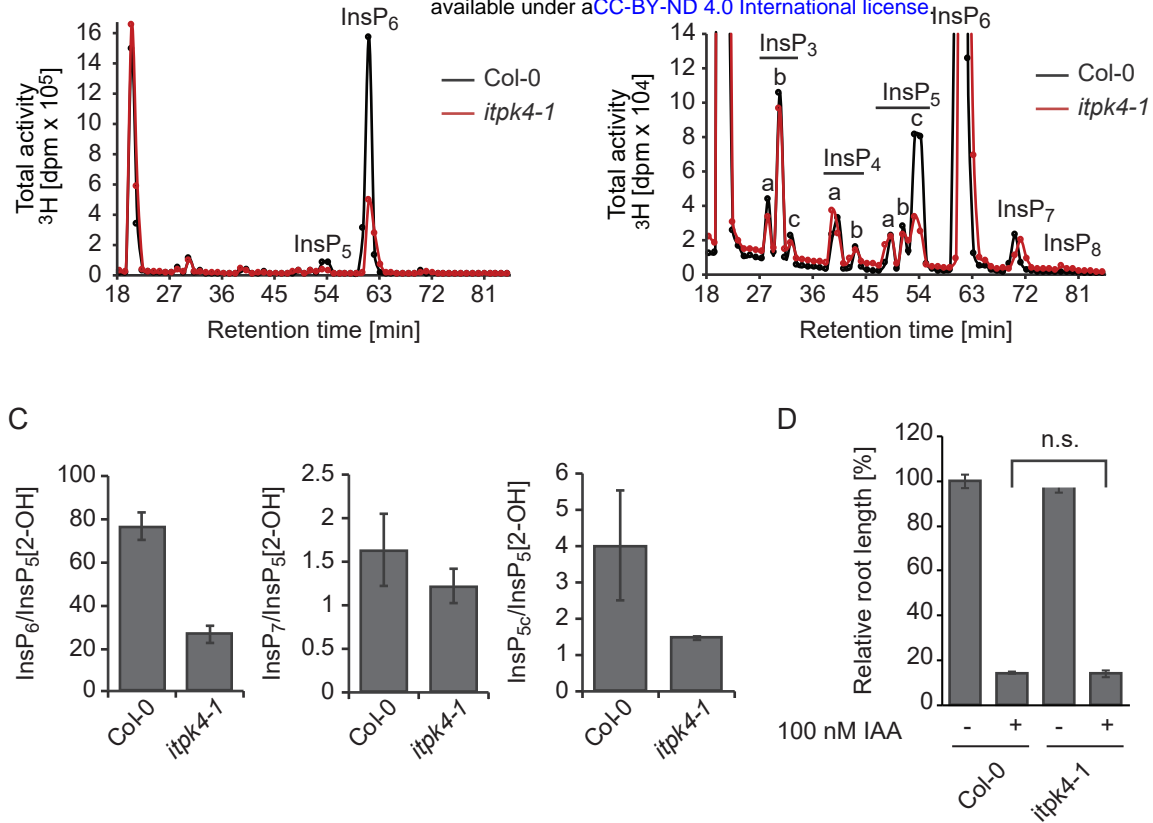



Figure 4

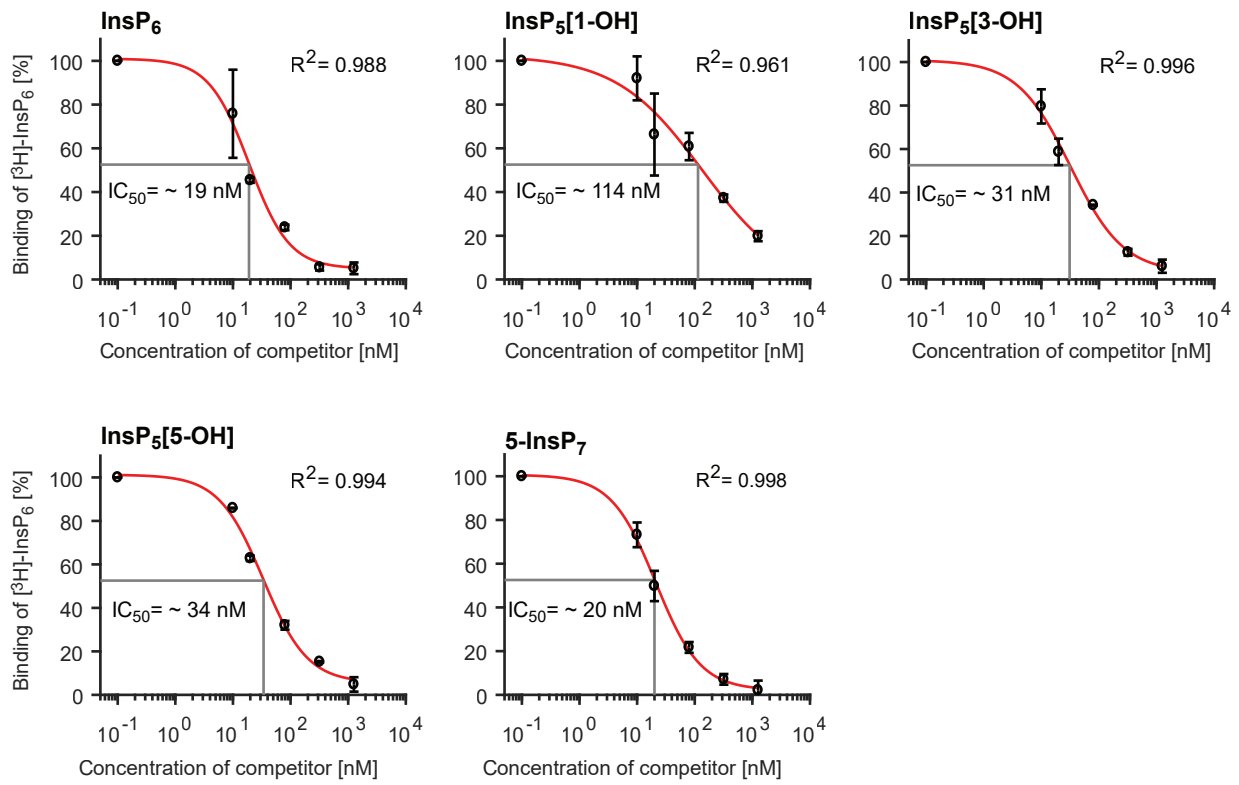

Figure 5

bioRxiv preprint doi: <https://doi.org/10.1101/2020.04.23.058487>; this version posted April 25, 2020. The copyright holder for this preprint (which was not certified by peer review) is the author/funder, who has granted bioRxiv a license to display the preprint in perpetuity. It is made available under aCC-BY-ND 4.0 International license.

A

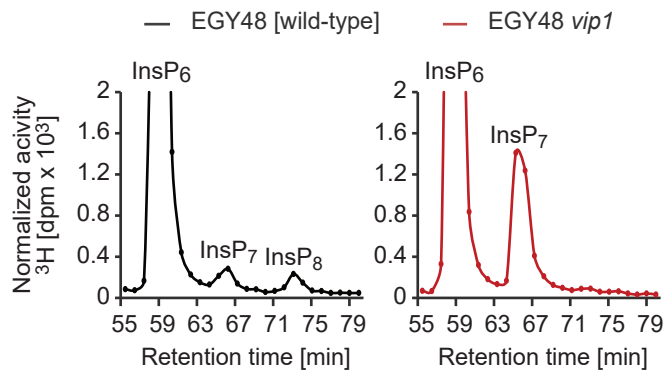

B

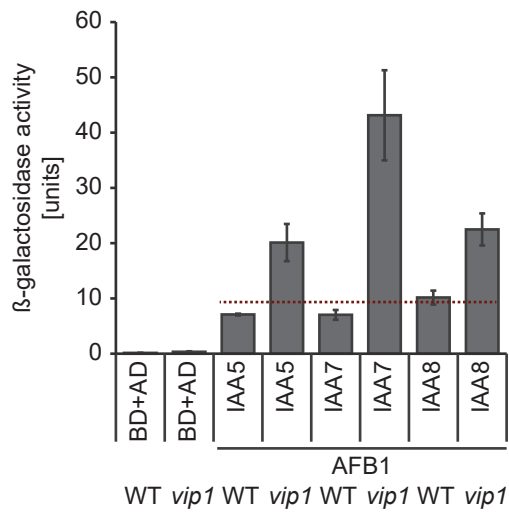

C

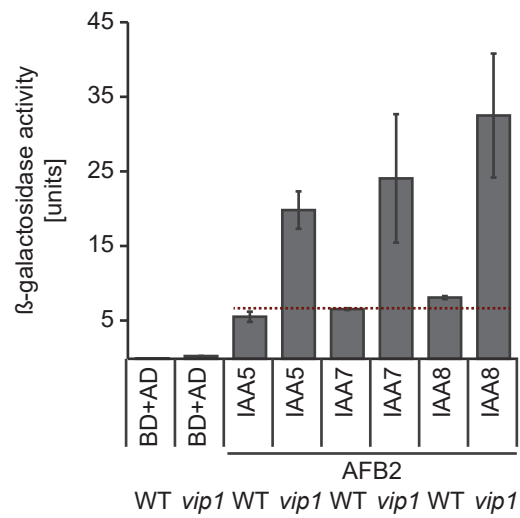

Figure 6

A

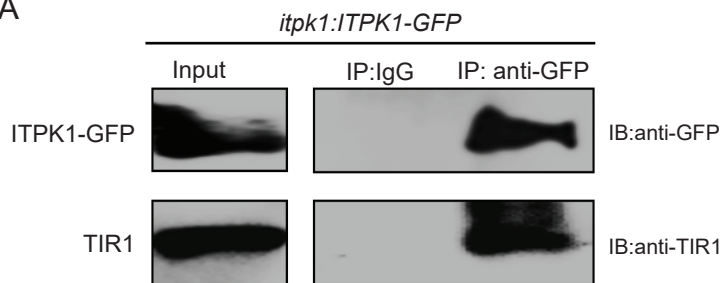

B

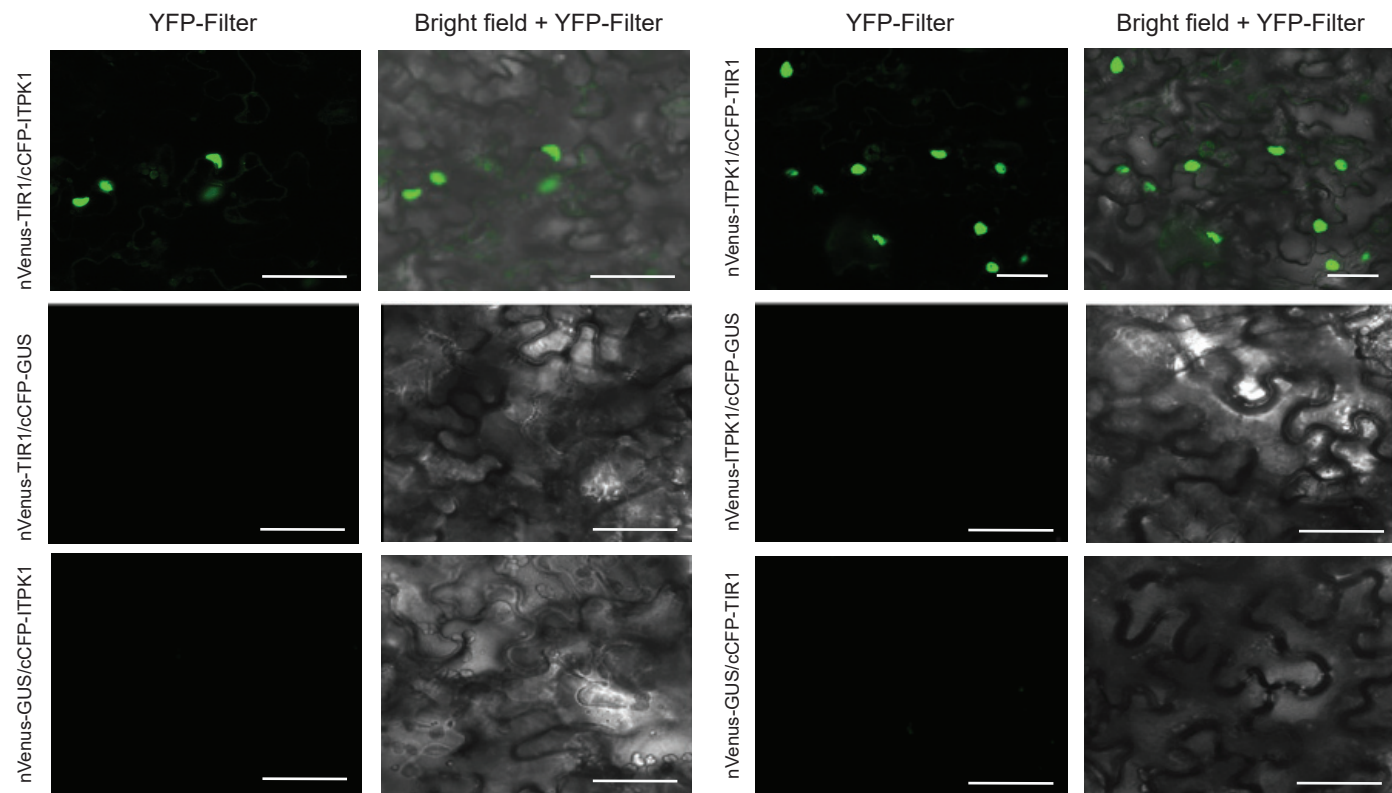

Source: https://www.biorxiv.org/content/10.1101/2020.04.23.058487.full.pdf
